# Supplementary material
Source: MDPI journal article supplement (https://www.mdpi.com/1999-4907/13/4/518)
Supplement: s1 [file s1]

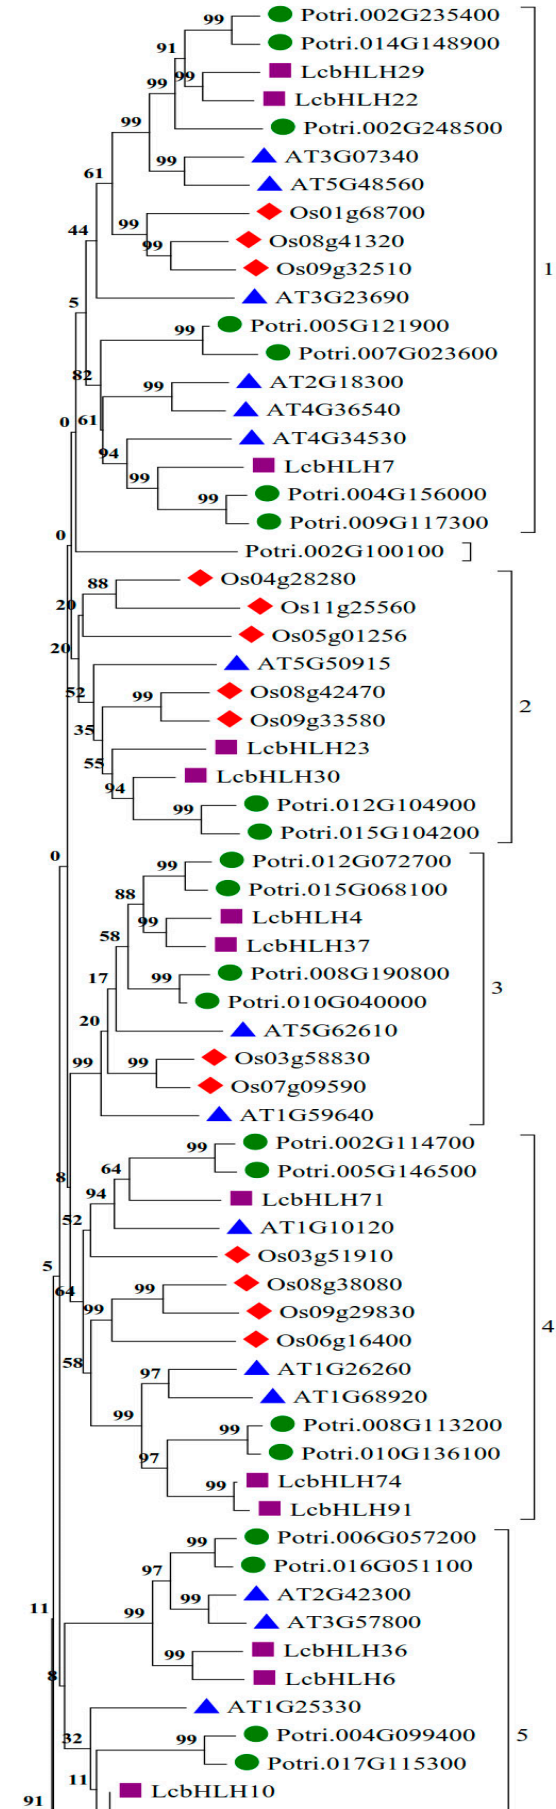

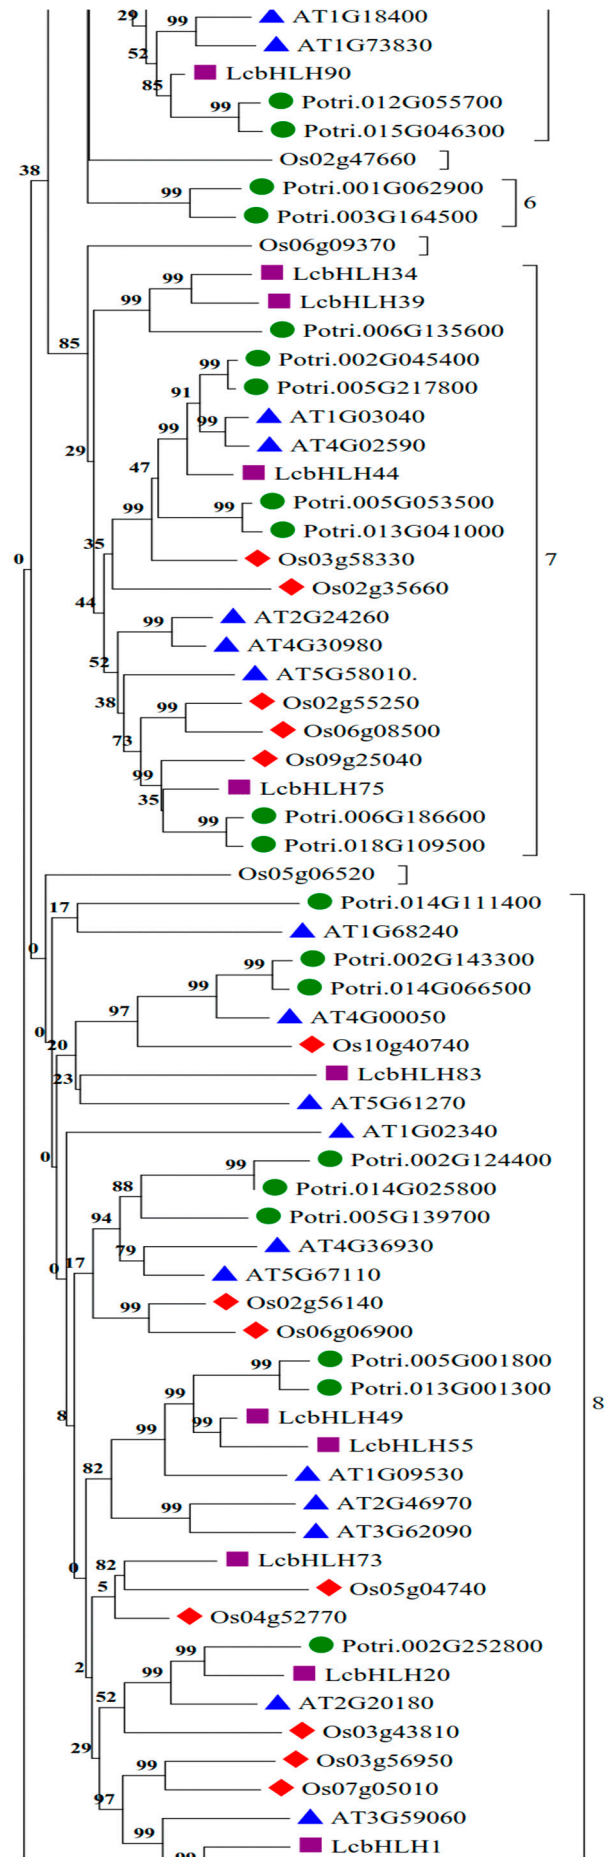

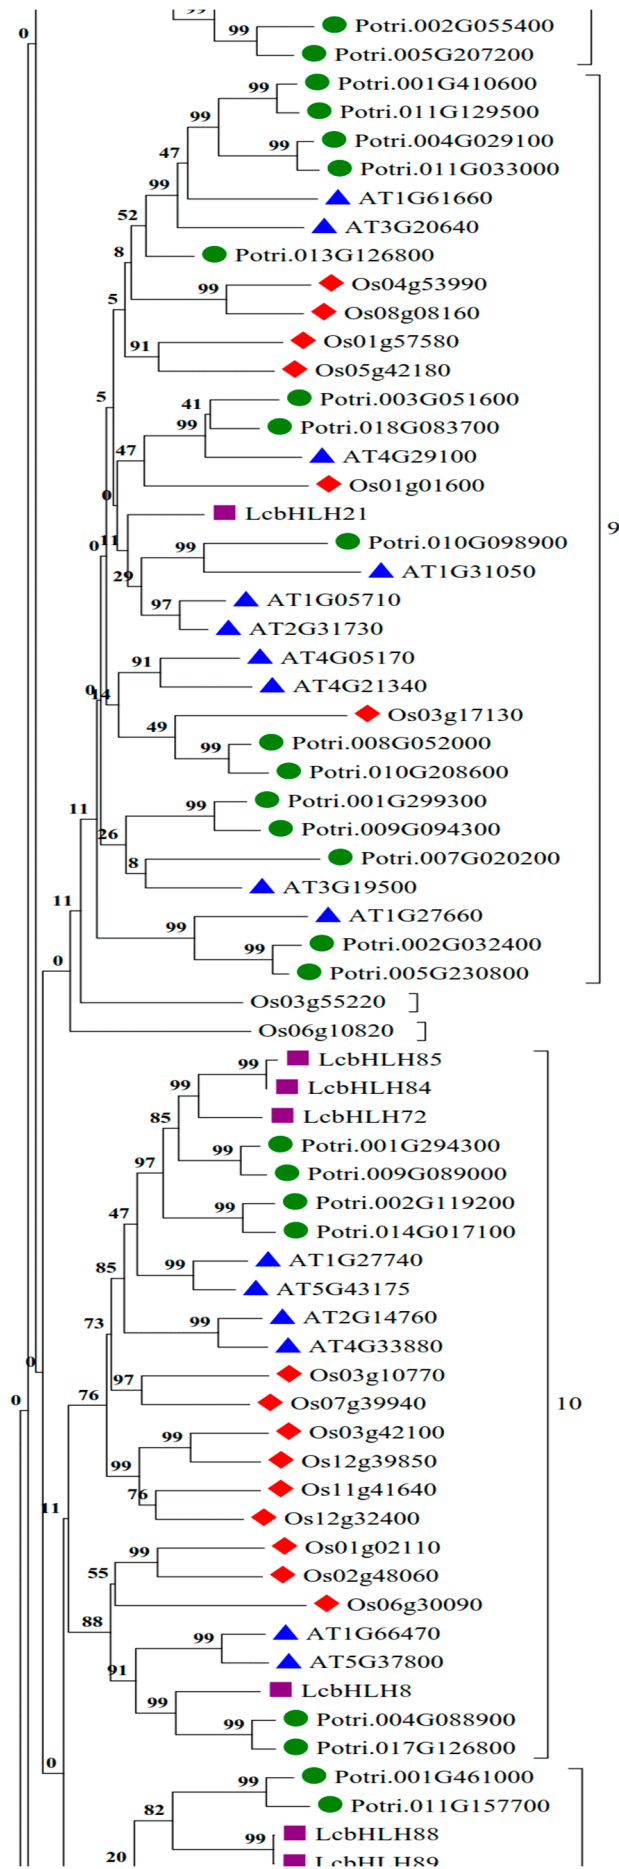

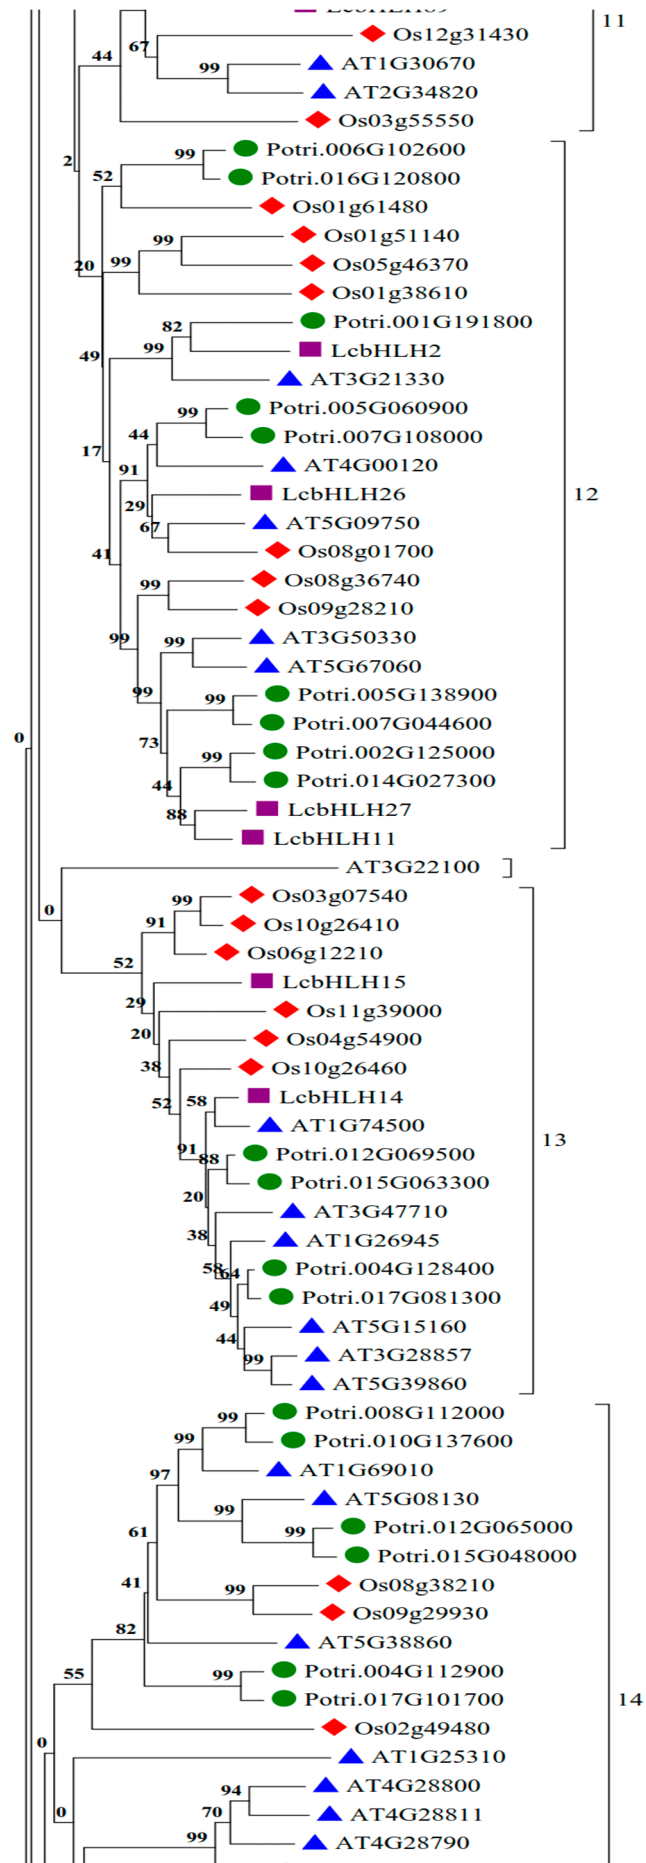

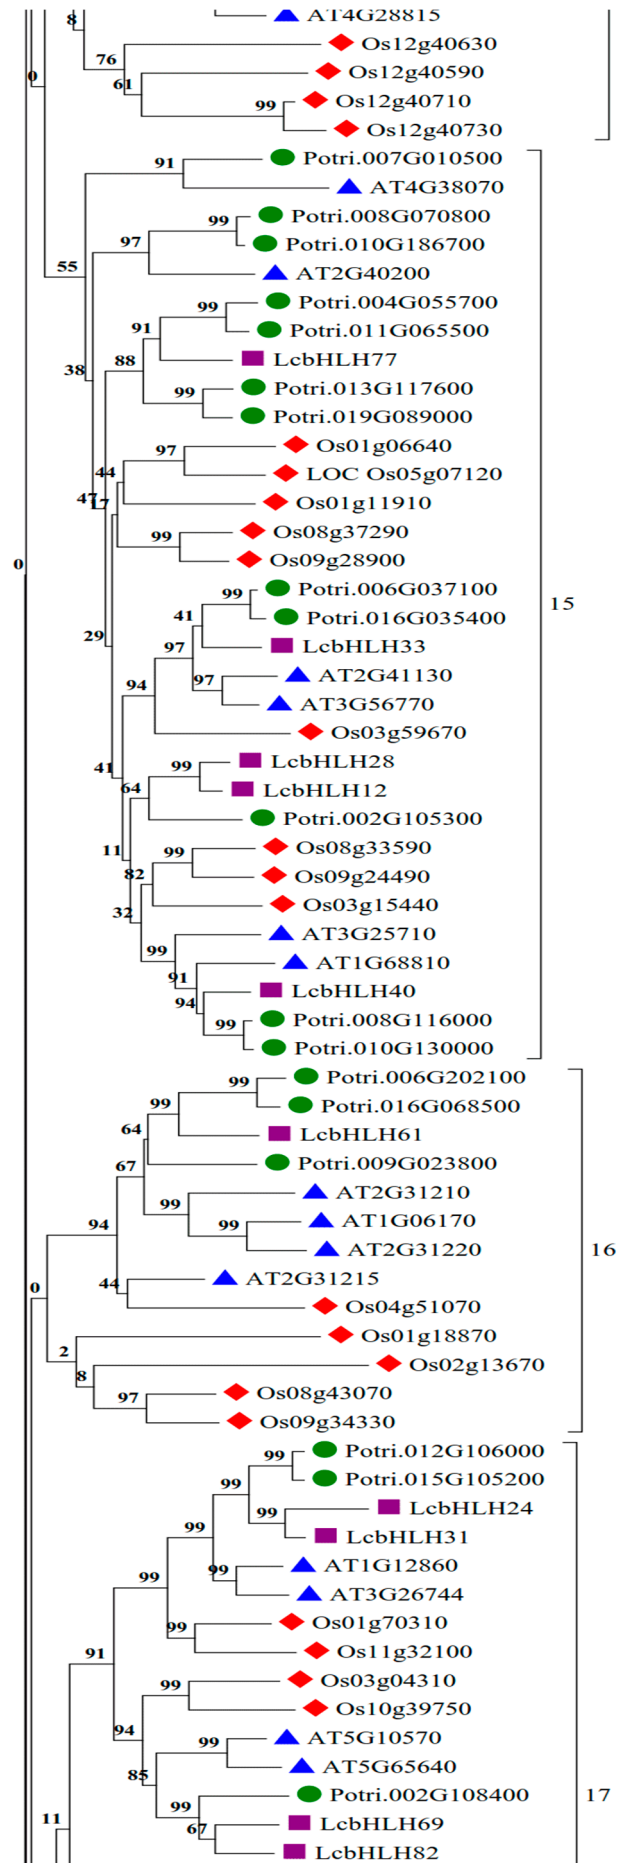

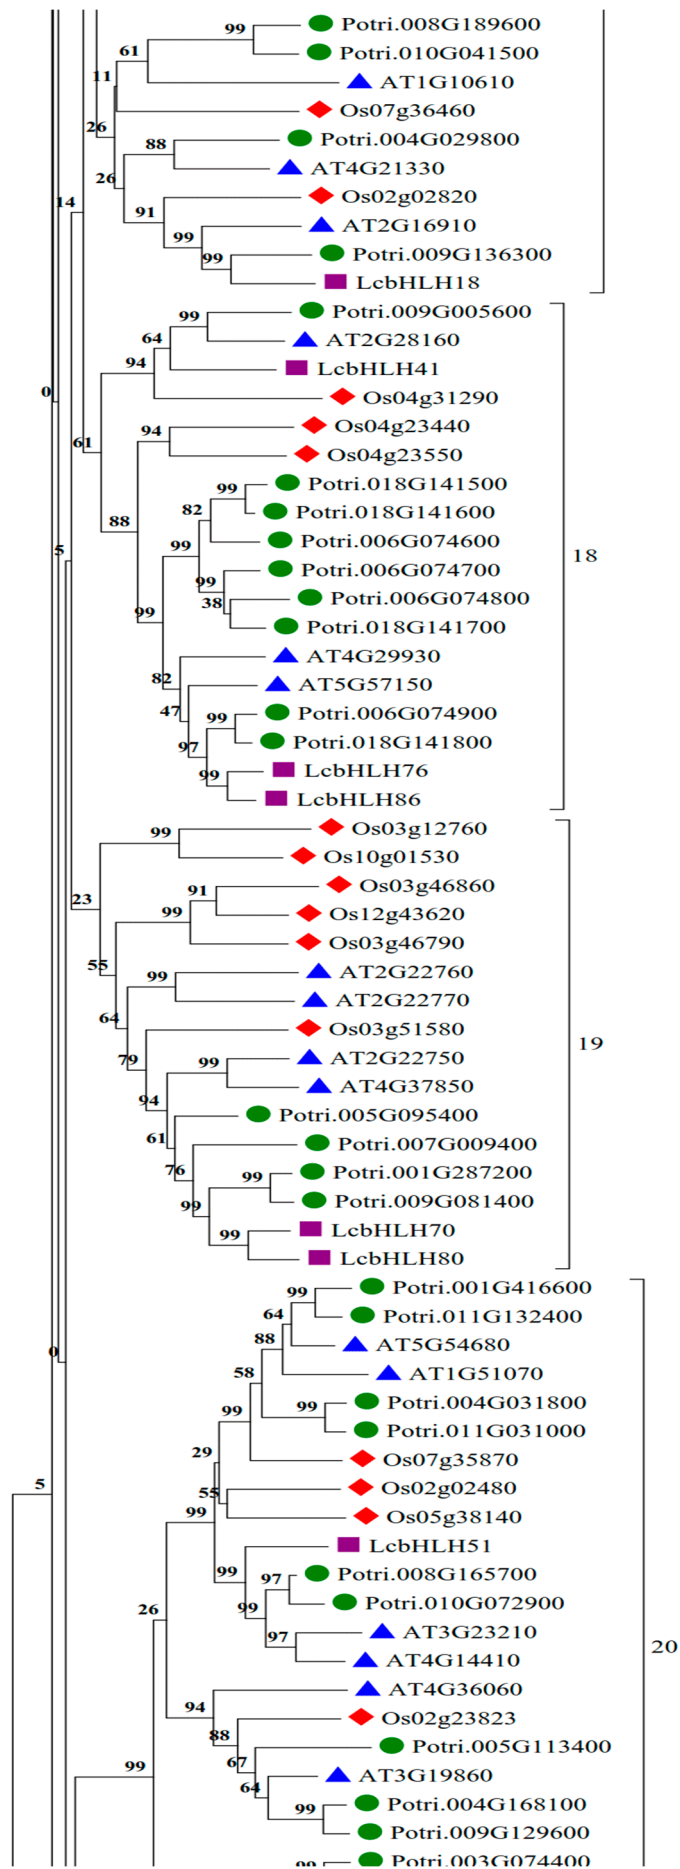

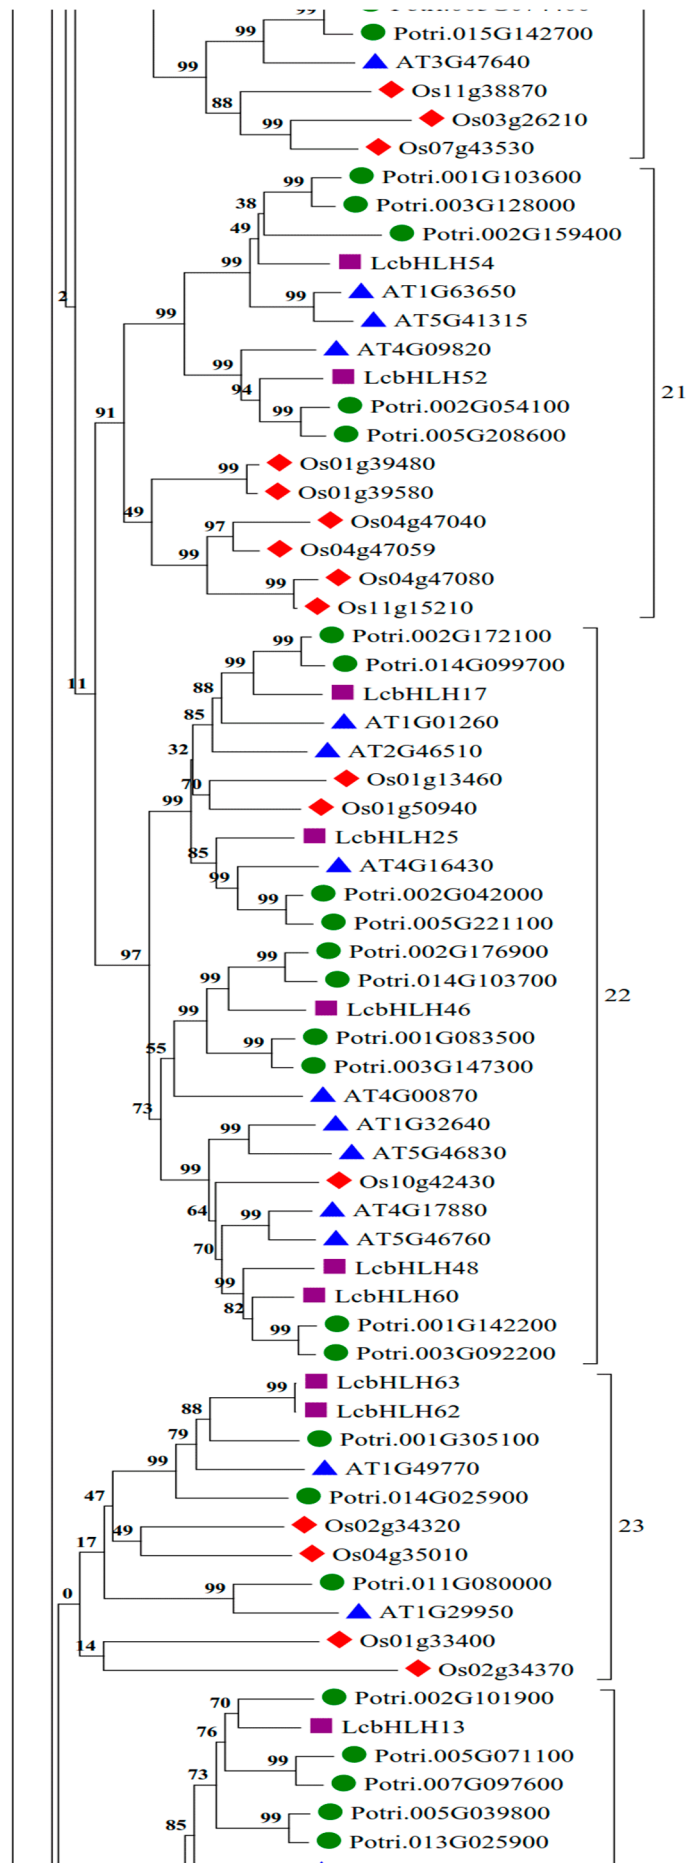

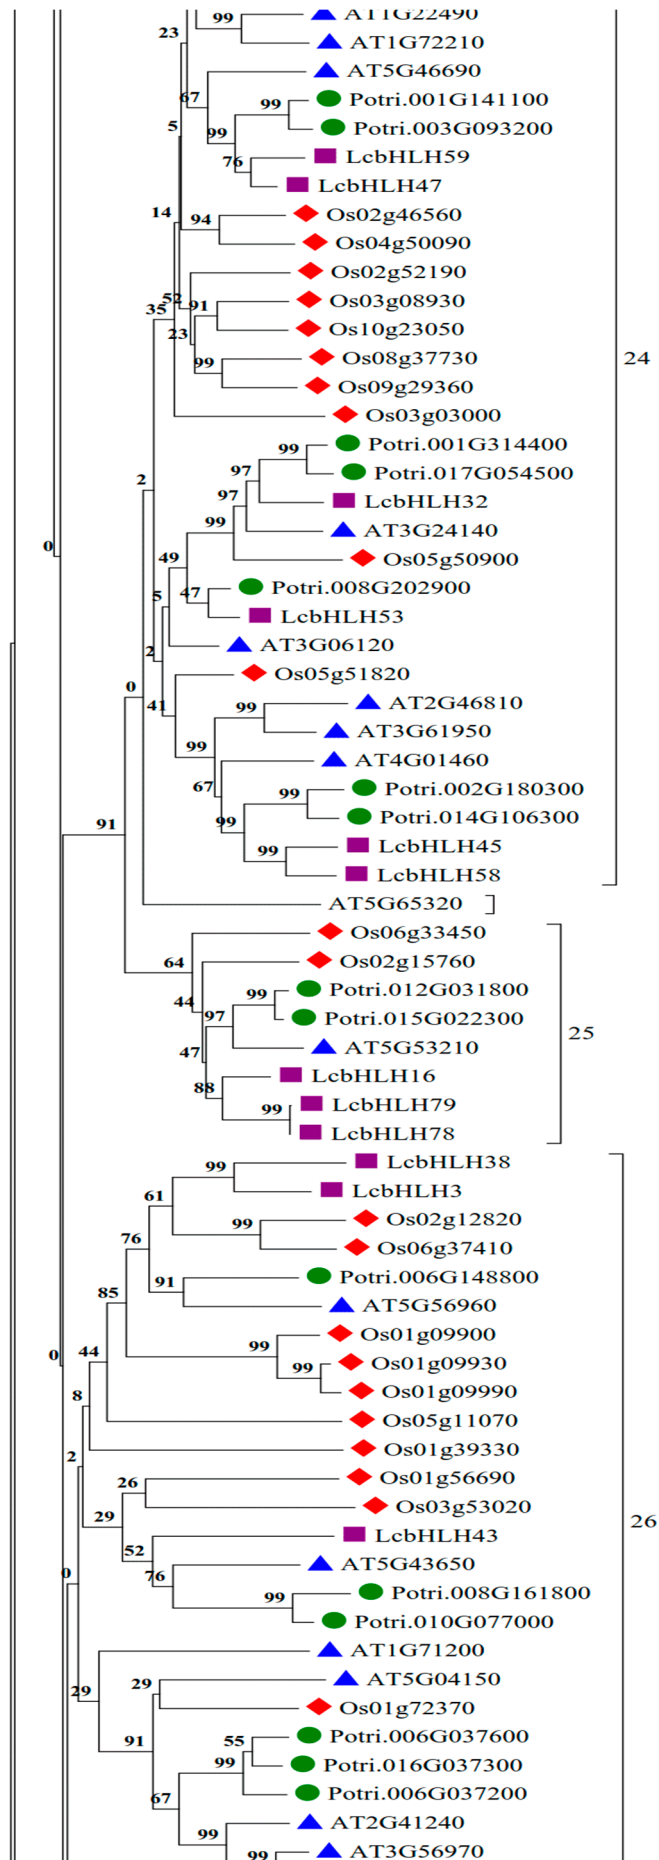



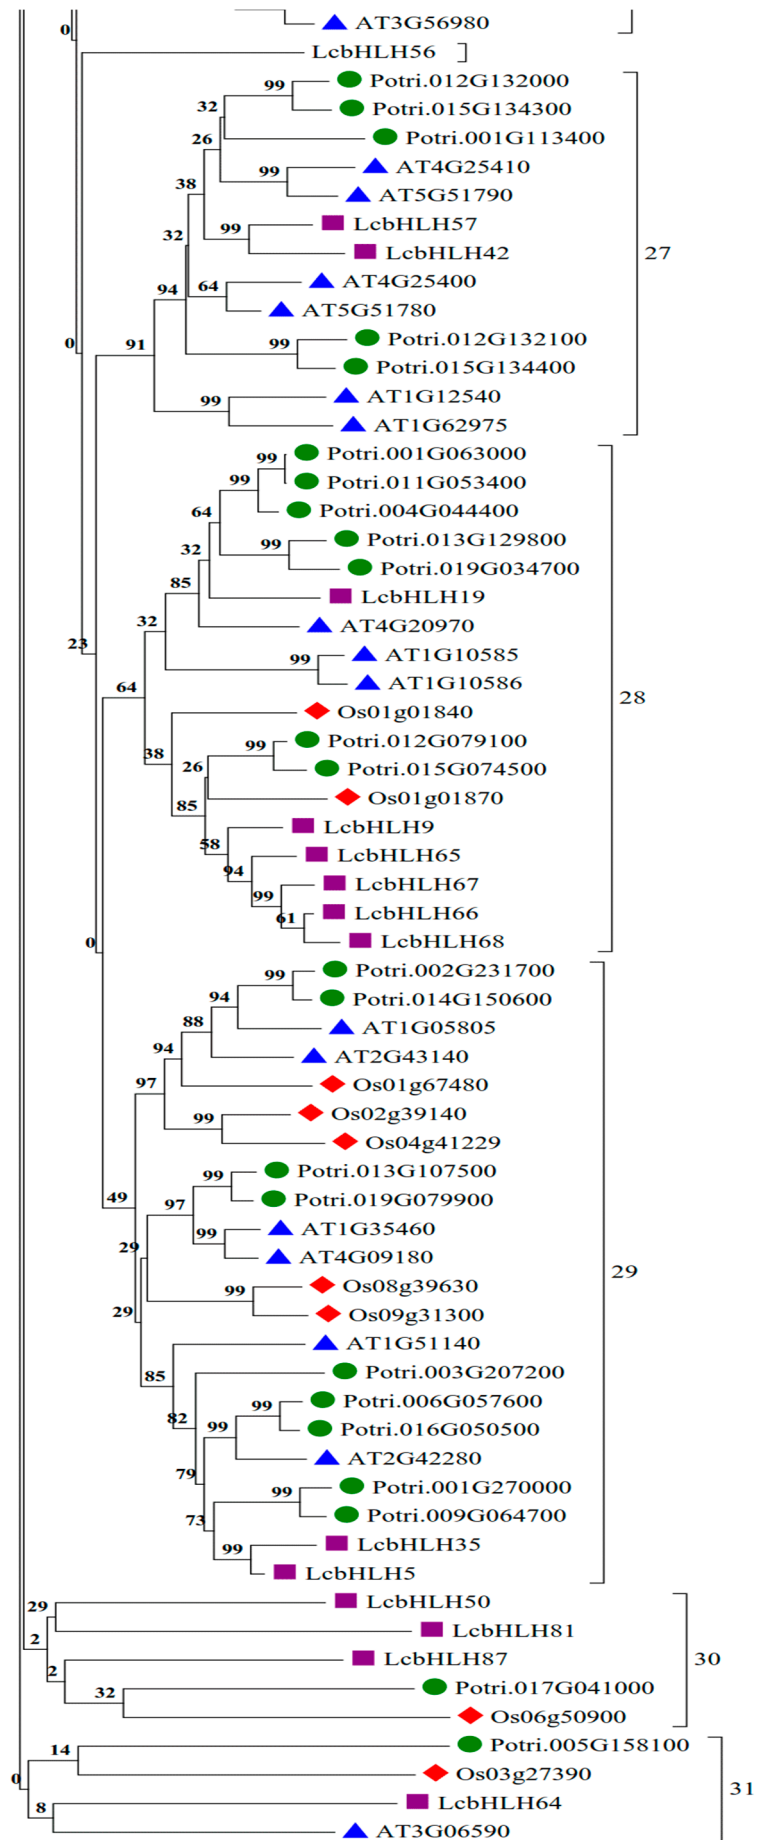

**FigureS1.** Members of the bHLH family from four species: *Arabidopsis thaliana* (blue triangle), rice (red quadrangle), poplar (green circle), and *Liriodendron chinense* (purple square). The number on the right indicates their grouping.
