# Supplementary material
Source: MDPI journal article supplement (https://www.mdpi.com/1999-4907/13/4/518)
Supplement: s1 [file s1]

Archive with 3 entries (3 files):
- bHLH_data sheet.xlsx
- Figure S1.pdf
- Figure S2.pdf
