# Supplementary material
Source: MDPI journal article supplement (https://www.mdpi.com/1999-4907/13/4/518)
Supplement: s1 [file s1 › bHLH_data sheet.xlsx]

## Sheet: TableS1
Table S1.Basic protein information of LcbHLH family members
No.	Gene name	Chr	Location		MW (kDa)	pI	I. I.	Protein (aa)	GRAVY
Lchi20729	LcbHLH1	chr1	35380876	35389988	60.09	6.59	53.23	550	-0.619
Lchi00814	LcbHLH2	chr1	101455215	101460162	52.84	5.7	49.55	474	-0.545
Lchi00766	LcbHLH3	chr1	103014313	103026838	48.82	8.82	49.35	434	-0.559
Lchi00695	LcbHLH4	chr1	105202556	105217819	33.09	6.12	64.16	304	-0.635
Lchi06181	LcbHLH5	chr1	111989300	111993869	28.17	9.28	48.58	257	-0.596
Lchi06173	LcbHLH6	chr1	112217293	112227082	40.27	6.06	56.43	369	-0.62
Lchi11320	LcbHLH7	chr2	306428	309772	48.85	6.33	54.63	439	-0.702
Lchi14417	LcbHLH8	chr2	5618158	5619977	33.17	5.51	36.04	305	-0.644
Lchi26353	LcbHLH9	chr2	6531639	6533150	19.84	8.43	51.7	175	-0.148
Lchi16278	LcbHLH10	chr2	11046658	11047864	14.01	9.77	66.81	120	-0.765
Lchi01912	LcbHLH11	chr2	78219753	78256109	23.46	9.44	51.81	209	-0.449
Lchi24834	LcbHLH12	chr2	81921413	81924111	24.55	9.71	58.09	229	-0.385
Lchi13722	LcbHLH13	chr2	84244559	84246579	36.69	5.09	63.27	330	-0.325
Lchi02950	LcbHLH14	chr2	91958601	91958981	10.23	9.28	74.97	92	-0.476
Lchi02944	LcbHLH15	chr2	92200102	92200878	10.19	6.74	91.12	88	-0.465
Lchi22119	LcbHLH16	chr3	687685	698087	26.73	4.92	53.88	247	-0.244
Lchi14159	LcbHLH17	chr3	4056889	4059456	71.49	6.97	51.6	647	-0.542
Lchi11540	LcbHLH18	chr3	16078468	16084791	70.11	5.7	44.66	624	-0.669
Lchi18013	LcbHLH19	chr3	20273880	20274765	23.06	6.34	56.51	199	-0.281
Lchi20091	LcbHLH20	chr3	27951444	27965100	56.91	6.14	69.94	522	-0.731
Lchi16102	LcbHLH21	chr3	51971228	51976609	16.75	6.73	47.38	147	-0.525
Lchi20429	LcbHLH22	chr3	87795459	87798606	57.51	6.05	54.36	531	-0.583
Lchi16448	LcbHLH23	chr3	100941231	100942623	25.57	8.2	56.24	232	-0.564
Lchi16421	LcbHLH24	chr3	101853881	101859791	51.73	4.66	55.81	476	-0.542
Lchi01978	LcbHLH25	chr4	82842666	82844114	46.99	6.77	45.98	425	-0.371
Lchi02121	LcbHLH26	chr4	86860120	86860960	26.26	5.98	58.74	238	-0.673
Lchi02198	LcbHLH27	chr4	89111123	89125832	28.02	9.69	71.23	253	-0.396
Lchi02287	LcbHLH28	chr4	91666943	91670285	26.21	9.6	62.35	241	-0.437
Lchi02551	LcbHLH29	chr5	2155335	2157880	65.42	7.23	54.87	604	-0.655
Lchi02415	LcbHLH30	chr5	6324529	6360425	23.12	9.12	56.39	205	-0.557
Lchi02399	LcbHLH31	chr5	6887033	6901804	59.99	5.37	54.32	551	-0.495
Lchi22915	LcbHLH32	chr5	13973786	13975591	45.37	5.5	63.76	408	-0.391
Lchi17799	LcbHLH33	chr5	26708148	26710567	25.41	7.65	53.81	227	-0.539
Lchi02635	LcbHLH34	chr5	67708474	67715322	52.56	6.11	56.69	490	-0.396
Lchi06847	LcbHLH35	chr6	4710890	4714253	45.5	6.6	55.24	421	-0.671
Lchi06853	LcbHLH36	chr6	4922138	4929072	28.37	8.81	65.6	261	-0.712
Lchi11986	LcbHLH37	chr6	9650286	9658814	30.03	5.52	59.09	276	-0.729
Lchi03429	LcbHLH38	chr6	11499107	11504857	57.89	6.52	78.65	511	-0.45
Lchi11451	LcbHLH39	chr7	2191112	2200854	54.38	5.14	58.46	513	-0.442
Lchi16326	LcbHLH40	chr7	27414196	27417390	37.16	6.07	57.19	338	-0.511
Lchi09448	LcbHLH41	chr7	48151423	48152893	34.67	5.42	49	313	-0.366
Lchi17861	LcbHLH42	chr8	12683786	12684852	28.19	9.02	51.97	251	-0.317
Lchi13478	LcbHLH43	chr8	16407886	16409680	25.26	8.4	61.36	219	-0.645
Lchi13518	LcbHLH44	chr8	17999732	18012616	33.33	5.63	53.04	312	-0.435
Lchi06660	LcbHLH45	chr8	43658017	43659441	45.79	5.92	65.54	409	-0.447
Lchi06541	LcbHLH46	chr8	51093687	51122626	59.07	6.28	49.3	530	-0.502
Lchi19282	LcbHLH47	chr8	76821346	76826021	12.24	7.87	80.82	105	-0.816
Lchi08305	LcbHLH48	chr8	77349307	77352077	71.33	6.18	50.14	647	-0.517
Lchi00040	LcbHLH49	chr9	840740	845241	39.37	7.67	70.15	361	-0.445
Lchi24184	LcbHLH50	chr9	25555230	25567402	88.4	5.53	46.82	815	-0.243
Lchi24186	LcbHLH51	chr9	25619034	25635209	24.65	5.6	64.42	220	-0.678
Lchi22649	LcbHLH52	chr9	44187422	44212739	80.31	6.62	59.63	712	-0.709
Lchi22682	LcbHLH53	chr9	46136444	46138991	15.63	9.91	72.58	139	-0.217
Lchi15176	LcbHLH54	chr9	51976058	51991842	74.1	5.56	55.97	668	-0.503
Lchi16600	LcbHLH55	chr10	1527737	1532067	78.59	8.1	60.62	729	-0.44
Lchi17707	LcbHLH56	chr10	22602934	22604080	24.94	9.19	56.23	223	-0.596
Lchi13082	LcbHLH57	chr11	34133357	34134000	21.41	9.23	59.62	193	-0.332
Lchi21333	LcbHLH58	chr11	43111635	43128463	45.74	6.44	58.79	407	-0.45
Lchi01252	LcbHLH59	chr11	60337663	60343256	37.11	6.54	54.97	329	-0.422
Lchi01242	LcbHLH60	chr11	60705540	60707509	57.4	6.44	52.85	524	-0.38
Lchi01150	LcbHLH61	chr11	63214594	63217742	45.16	6.13	49.55	400	-0.585
Lchi22331	LcbHLH62	chr12	37365105	37367410	31.87	9	56.04	288	-0.472
Lchi22330	LcbHLH63	chr12	37421525	37423830	31.84	9	55.8	288	-0.47
Lchi28845	LcbHLH64	chr12	51762540	51791127	26.96	9.79	31.28	238	-0.451
Lchi07461	LcbHLH65	chr12	68205704	68208818	18.38	8.7	41.96	164	-0.211
Lchi07462	LcbHLH66	chr12	68252589	68254372	19.6	9.32	40.96	174	-0.278
Lchi07463	LcbHLH67	chr12	68389639	68390791	17.8	8.88	44.67	160	-0.168
Lchi07464	LcbHLH68	chr12	68454043	68455588	24.81	9.07	45.61	218	-0.143
Lchi18250	LcbHLH69	chr13	7752473	7755975	37.47	4.79	65.75	333	-0.388
Lchi18265	LcbHLH70	chr13	8328958	8331684	37.77	8.3	51.69	339	-0.487
Lchi26978	LcbHLH71	chr13	9801082	9805821	37.68	6.12	44.27	337	-0.591
Lchi14936	LcbHLH72	chr13	13487755	13490398	37.23	4.93	57.29	338	-0.687
Lchi10888	LcbHLH73	chr13	35381918	35398316	27.2	6.18	83.58	249	-0.598
Lchi20959	LcbHLH74	chr14	17799135	17817746	47.48	5.32	44.94	437	-0.511
Lchi09571	LcbHLH75	chr14	57008441	57015314	38.35	8.56	59.8	365	-0.392
Lchi03337	LcbHLH76	chr14	68600308	68605605	27.67	5.32	46.06	244	-0.608
Lchi03890	LcbHLH77	chr15	69104001	69108322	28.7	9.51	50.47	259	-0.398
Lchi17061	LcbHLH78	chr15	77413483	77414972	31.99	6.08	66.15	292	-0.21
Lchi27097	LcbHLH79	chr15	78288616	78290011	32.21	5.92	65.77	294	-0.196
Lchi20027	LcbHLH80	chr16	23149633	23153918	40.9	6.23	54.24	369	-0.566
Lchi20040	LcbHLH81	chr16	23539278	23550207	19.47	4.59	52.98	177	-0.353
Lchi18004	LcbHLH82	chr16	24019826	24023012	31.1	5.65	58.7	270	-0.746
Lchi27198	LcbHLH83	chr16	41862831	41903927	75.6	7.91	60.01	685	-0.413
Lchi15050	LcbHLH84	chr16	65408413	65410709	34.61	4.73	50.08	321	-0.61
Lchi15048	LcbHLH85	chr16	65463527	65465881	42.93	4.64	53.56	393	-0.516
Lchi05157	LcbHLH86	chr17	66784763	66791440	27.54	5.11	44.13	245	-0.461
Lchi12859	LcbHLH87	chr18	7603490	7613338	88.04	5.39	47.05	798	-0.322
Lchi27525	LcbHLH88	chr19	51437434	51438921	28.71	5.39	54.78	260	-0.191
Lchi27268	LcbHLH89	chr19	51720137	51721624	28.71	5.39	57.42	260	-0.16
Lchi29810	LcbHLH90	scaffold2361	152709	154815	17.92	8.6	29.49	155	-0.609
Lchi33877	LcbHLH91	scaffold3218	2219	19842	51.35	6.06	45.29	465	-0.399

## Sheet: TableS2
Table S2. The primers used in the qRT-PCR.
Lc-actin-F	ATTTCTGCCCTATCAACTTTCG
Lc-actin-R	TTGTTATTTATTGTCACTACCTCCC
q-LcbHLH54-F	CAACAAGGGGCGTTGGAATG
q-LcbHLH54-R	GGCCTCTTAGCCTGTTGGTT
q-LcbHLH69-F	TCGAACATCGATACTCGGCG
q-LcbHLH69-R	GCTCCACATCGAACTTGGGA
q-LcbHLH39-F	ACCCACATCCCAGTTTCGAC
q-LcbHLH39-R	TTCTGCGGCTCTTCCTGTTT
q-LcbHLH24-F	TTTCCAAACAGGGCCAAGGT
q-LcbHLH24-R	CTATCCGAATGGGACGGACG
q-LcbHLH55-F	GAGCTCCAATCATGGGCTGT
q-LcbHLH55-R	GGAATTCACGATCGGACGGA
q-LcbHLH20-F	TTGACGTCATCTTCGGGTGG
q-LcbHLH20-R	TTCATACTCGGCATCCTCGC
q-LcbHLH86-F	TTGGGATGAAGCGATCTCCG
q-LcbHLH86-R	ACAGCTCGAAGAGCGAAGAG
q-LcbHLH35-F	CCCTGATGCAGAGAGCATGT
q-LcbHLH35-R	CTTCAGCCTCATGGTCGAGG
q-LcbHLH9-F	CGGCCGTTTACATCAAGCAA
q-LcbHLH9-R	AACCACAGGCAATCTCAGGC
q-LcbHLH56-F	ACTCATCCGACTGCGACATC
q-LcbHLH56-R	ACGATAGGGGGACCATTGGA

## Sheet: TableS3
Table S3. The segmental and tandem duplication events of LcbHLHs.
Duplicated Gene Pairs		Ka	Ks	Ka/Ks	EffectiveLen	AverageS-sites	AverageN-sites	cN	cS	pN	pS
LcbHLH5	LcbHLH35	0.144302	1.002	0.144013	753	166.417	586.583	77	92	0.131269	0.552829
LcbHLH6	LcbHLH36	0.194861	0.727196	0.267963	765	182.75	582.25	99.9167	85.0833	0.171604	0.465572
LcbHLH3	Lchi03428	0.502155	1.94461	0.258229	465	109.167	355.833	130.25	75.75	0.366042	0.693893
LcbHLH4	LcbHLH37	0.14974	0.790412	0.189446	801	182.167	618.833	84	89	0.135739	0.488564
LcbHLH55	LcbHLH49	0.186112	0.638678	0.291402	1077	243.25	833.75	137.417	104.583	0.164818	0.429942
LcbHLH59	Lchi09680	0.369881	1.85662	0.199223	453	105.667	347.333	101.417	72.5833	0.291987	0.686909
LcbHLH59	LcbHLH47	0.164502	0.976893	0.168394	309	68.6667	240.333	35.5	37.5	0.147712	0.546117
LcbHLH60	LcbHLH48	0.23612	1.18433	0.199371	1515	364.333	1150.67	233.083	216.917	0.202564	0.59538
LcbHLH58	LcbHLH45	0.177944	0.980212	0.181536	1170	266.75	903.25	143.083	145.917	0.158409	0.547017
Lchi13346	LcbHLH44	0.141648	0.863099	0.164116	810	196.667	613.333	79.1667	100.833	0.129076	0.512712
LcbHLH65	LcbHLH9	0.255674	1.61064	0.15874	477	104.667	372.333	80.6667	69.3333	0.216652	0.66242
LcbHLH72	LcbHLH84	0.231853	1.13666	0.203977	915	200.917	714.083	142.417	117.583	0.19944	0.585234
LcbHLH69	LcbHLH82	0.210144	0.792733	0.265087	801	180.333	620.667	113.75	88.25	0.183271	0.489372
LcbHLH70	LcbHLH80	0.143914	0.887101	0.162229	1002	233.25	768.75	100.667	121.333	0.130949	0.520186
LcbHLH76	LcbHLH86	0.137934	1.19981	0.114963	726	159.833	566.167	71.3333	95.6667	0.125994	0.59854
LcbHLH79	LcbHLH16	0.187114	1.24725	0.150022	678	157.667	520.333	86.1667	95.8333	0.165599	0.607822
LcbHLH78	LcbHLH16	0.193629	1.31712	0.14701	672	156.333	515.667	88	97	0.170653	0.620469
LcbHLH11	LcbHLH27	0.172385	1.03441	0.166649	612	136.917	475.083	73.1667	76.8333	0.154008	0.561169
LcbHLH12	LcbHLH28	0.148061	0.968949	0.152806	678	170.667	507.333	68.1667	92.8333	0.134363	0.543945
LcbHLH13	Lchi09680	0.101928	0.939861	0.10845	465	108.25	356.75	34	58	0.0953048	0.535797
LcbHLH14	Lchi13991	0.062727	1.4053	0.0446359	264	64.5833	199.417	12	41	0.0601755	0.634839
LcbHLH23	LcbHLH30	0.306461	0.761728	0.402323	456	98.25	357.75	90	47	0.251572	0.478372
LcbHLH22	LcbHLH29	0.199426	1.23161	0.161923	1566	362.5	1203.5	210.75	219.25	0.175114	0.604828
LcbHLH34	LcbHLH39	0.236712	0.812119	0.291474	1398	335.167	1062.83	215.75	166.25	0.202995	0.496022
LcbHLH5	LcbHLH6	0.972383	NaN	NaN	696	162.25	533.75	290.833	135.167	0.544887	0.833077
LcbHLH14	LcbHLH15	0.268248	2.2172	0.120985	258	61.4167	196.583	44.3333	43.6667	0.225519	0.710991
LcbHLH30	LcbHLH31	0.732657	NaN	NaN	603	133.083	469.917	219.75	116.25	0.467636	0.873513
LcbHLH35	LcbHLH36	1.00285	2.64512	0.379131	759	178.583	580.417	321	130	0.553051	0.727951
LcbHLH47	LcbHLH48	0.859104	NaN	NaN	291	68.9167	222.083	113.583	58.4167	0.511445	0.847642
LcbHLH50	LcbHLH51	0.85514	3.33488	0.256423	648	144.583	503.417	256.833	107.167	0.51018	0.74121
LcbHLH59	LcbHLH60	0.892278	NaN	NaN	861	200.583	660.417	344.583	153.417	0.521767	0.764853
LcbHLH62	LcbHLH63	0.00150565	0	NaN	858	193.167	664.833	1	0	0.00150414	0
LcbHLH69	LcbHLH70	1.08278	NaN	NaN	921	214	707	405.083	164.917	0.572961	0.770639
LcbHLH65	LcbHLH66	0.210083	0.56654	0.370817	477	105.417	371.583	68.0833	41.9167	0.183225	0.397628
LcbHLH65	LcbHLH67	0.175902	0.592641	0.296811	444	96.4167	347.583	54.5	39.5	0.156797	0.40968
LcbHLH65	LcbHLH68	0.200376	0.733805	0.273064	477	103.083	373.917	65.75	48.25	0.175841	0.468068
LcbHLH66	LcbHLH67	0.150166	0.231513	0.64863	474	102.917	371.083	50.5	20.5	0.136088	0.19919
LcbHLH66	LcbHLH68	0.0645421	0.158877	0.40624	516	111.75	404.25	25	16	0.0618429	0.143177
LcbHLH67	LcbHLH68	0.0987609	0.209609	0.471167	474	101.167	372.833	34.5	18.5	0.0925346	0.182867
LcbHLH78	LcbHLH79	0.00151095	0.0195292	0.0773691	870	207.5	662.5	1	4	0.00150943	0.0192771
LcbHLH80	LcbHLH81	1.01493	NaN	NaN	525	121.667	403.333	224.333	95.6667	0.556198	0.786301
LcbHLH80	LcbHLH82	0.903341	NaN	NaN	765	169.25	595.75	312.833	138.167	0.525108	0.816347
LcbHLH81	LcbHLH82	0.913008	NaN	NaN	525	118.583	406.417	214.583	92.4167	0.527989	0.779339
LcbHLH84	LcbHLH85	0.00877894	0.0312671	0.280773	957	212.25	744.75	6.5	6.5	0.00872776	0.0306243
LcbHLH88	LcbHLH89	0.00334169	0.0115721	0.288772	774	174.167	599.833	2	2	0.00333426	0.0114833

## Sheet: TableS4
Table S4. The Ka/Ks ratios between L.Chinenese and Arabidopsis thaliana
Duplicated Gene Pairs		Ka	Ks	Ka_Ks	EffectiveLen	AverageS-sites	AverageN-sites	cN	cS	pN	pS
AT5G46690.1	LcbHLH59	0.473255	NaN	NaN	918	213.5	704.5	247.25	161.75	0.350958	0.757611
AT5G46760.1	LcbHLH60	0.40453	NaN	NaN	1470	334.333	1135.67	355.083	276.917	0.312665	0.828265
AT5G65640.1	LcbHLH69	0.365452	3.4298	0.106552	894	201.75	692.25	200.25	149.75	0.289274	0.742255
AT5G53210.1	LcbHLH78	0.358544	NaN	NaN	840	197.333	642.667	183.167	148.833	0.28501	0.754223
AT5G65640.1	LcbHLH82	0.523803	2.88639	0.181473	780	170.75	609.25	229.667	125.333	0.376966	0.734017
AT5G57150.4	LcbHLH86	0.392796	NaN	NaN	708	154.75	553.25	169.167	126.833	0.305769	0.819602
AT5G39860.1	LcbHLH15	0.383961	NaN	NaN	258	60	198	59.5	52.5	0.300505	0.875
AT5G50915.2	LcbHLH23	0.42716	2.02563	0.210878	609	138.167	470.833	153.333	96.6667	0.325664	0.699638
AT5G53210.1	LcbHLH16	0.323199	NaN	NaN	687	155.083	531.917	139.667	127.333	0.262572	0.821064
AT5G13270.1	LcbHLH31	0.381387	2.51623	0.151571	2241	510.833	1730.17	517.25	369.75	0.29896	0.723817
AT5G62610.1	LcbHLH37	0.403435	4.74192	0.0850784	801	185.667	615.333	192	139	0.312026	0.748654
AT5G46690.1	LcbHLH47	0.353544	NaN	NaN	309	68.6667	240.333	67.75	55.25	0.2819	0.804612
AT5G46760.1	LcbHLH48	0.429307	NaN	NaN	1725	387.083	1337.92	437.333	322.667	0.326876	0.833584
AT5G43650.1	LcbHLH43	0.737197	3.65423	0.201738	633	134.25	498.75	234.083	99.9167	0.46934	0.744258
AT4G17880.1	LcbHLH60	0.349693	NaN	NaN	1467	334.583	1132.42	316.5	280.5	0.279491	0.838356
AT4G37850.2	LcbHLH70	0.547458	NaN	NaN	942	208.5	733.5	285	172	0.388548	0.82494
AT4G29930.3	LcbHLH76	0.394813	2.38354	0.165642	705	152	553	169.75	109.25	0.306962	0.71875
AT4G30980.2	LcbHLH75	0.479544	3.49971	0.137024	990	245.083	744.917	263.917	182.083	0.35429	0.742945
AT4G37850.2	LcbHLH80	0.497355	NaN	NaN	975	214.5	760.5	276.5	179.5	0.363577	0.83683
AT4G29930.3	LcbHLH86	0.422022	3.97902	0.106062	729	162.25	566.75	182.917	121.083	0.322747	0.746276
AT4G36540.1	LcbHLH7	0.539625	NaN	NaN	894	195.5	698.5	268.75	160.25	0.384753	0.819693
AT4G17880.1	LcbHLH48	0.396009	NaN	NaN	1692	381.333	1310.67	403.25	324.75	0.307668	0.851617
AT3G57800.1	LcbHLH6	0.448537	2.1718	0.206528	1059	249.333	809.667	273.333	176.667	0.337587	0.708556
AT3G28857.1	LcbHLH15	0.404606	NaN	NaN	258	58.6667	199.333	62.3333	49.6667	0.312709	0.846591
AT3G07340.1	LcbHLH29	0.45258	NaN	NaN	1335	309.167	1025.83	348.583	233.417	0.339805	0.754987
AT3G57800.1	LcbHLH36	0.390739	6.56798	0.0594915	717	176.583	540.417	164.583	132.417	0.304549	0.749882
AT3G06120.1	LcbHLH53	0.298747	NaN	NaN	411	96.8333	314.167	77.4167	78.5833	0.246419	0.811532
AT2G42280.3	LcbHLH5	0.533433	NaN	NaN	735	165	570	217.583	127.417	0.381725	0.772222
AT2G42300.1	LcbHLH6	0.379517	1.83441	0.206887	951	224.083	726.917	216.5	153.5	0.297833	0.685013
AT2G46970.1	LcbHLH55	0.727337	NaN	NaN	1215	275.583	939.417	437.417	214.583	0.465626	0.778651
AT2G46810.1	LcbHLH58	0.504888	NaN	NaN	1050	233.083	816.917	300.167	186.833	0.367439	0.801573
AT2G22750.3	LcbHLH70	0.553262	NaN	NaN	942	213.083	728.917	285.25	175.75	0.391334	0.824795
AT2G24260.1	LcbHLH75	0.438078	2.15744	0.203055	987	246.083	740.917	245.833	174.167	0.331796	0.707755
AT2G22750.3	LcbHLH80	0.502387	NaN	NaN	954	212.75	741.25	271.417	177.583	0.366161	0.834704
AT2G18300.3	LcbHLH7	0.569695	NaN	NaN	1047	225.167	821.833	328	173	0.399108	0.76832
AT2G46510.1	LcbHLH17	0.433857	NaN	NaN	1626	371.583	1254.42	413.25	317.75	0.329436	0.855124
AT2G42280.3	LcbHLH35	0.510514	NaN	NaN	1041	236.917	804.083	297.75	183.25	0.370297	0.773479
AT2G42300.1	LcbHLH36	0.463431	NaN	NaN	693	167.25	525.75	181.75	127.25	0.345697	0.760837
AT2G46970.1	LcbHLH49	0.611963	2.38084	0.257036	936	207.917	728.083	304.583	149.417	0.418336	0.718637
AT1G51140.1	LcbHLH5	0.612215	3.51698	0.174074	717	163.167	553.833	231.75	121.25	0.418447	0.743105
AT1G10585.1	LcbHLH66	0.669455	2.73296	0.244956	489	109.417	379.583	168.083	79.9167	0.44281	0.730388
AT1G10120.1	LcbHLH71	0.444018	2.74634	0.161676	882	188.167	693.833	232.5	137.5	0.335095	0.730735
AT1G27740.1	LcbHLH72	0.571605	1.83347	0.311761	768	164.25	603.75	241.5	112.5	0.4	0.684932
AT1G30670.1	LcbHLH89	0.663645	2.15563	0.307866	741	163.333	577.667	254.417	115.583	0.440421	0.707653
AT1G74500.1	LcbHLH14	0.122722	NaN	NaN	264	65.25	198.75	22.5	57.5	0.113208	0.881226
AT1G22490.2	LcbHLH13	0.458978	NaN	NaN	870	197.583	672.417	230.833	164.167	0.343289	0.830873
AT1G26945.1	LcbHLH14	0.136253	3.43873	0.039623	270	65.3333	204.667	25.5	48.5	0.124593	0.742347
AT1G12860.1	LcbHLH24	0.354857	NaN	NaN	1188	269.833	918.167	259.583	226.417	0.282719	0.839098
AT1G63650.3	LcbHLH54	0.417415	NaN	NaN	1728	385.25	1342.75	429.833	332.167	0.320114	0.862211

## Sheet: TableS5
Table S5. The Ka/Ks ratios between L.Chinenese and Oryza sativa
Duplicated Gene Pairs		Ka	Ks	Ka_Ks	EffectiveLen	AverageS-sites	AverageN-sites	cN	cS	pN	pS
LcbHLH28	Os08t0477900-00	0.524185	5.13201	0.10214	591	156.167	434.833	164	117	0.377156	0.7492
LcbHLH2	Os01t0566800-00	0.820076	NaN	NaN	1233	301.917	931.083	464.333	234.667	0.498702	0.777256
LcbHLH9	Os01t0108400-00	0.51032	NaN	NaN	513	115.917	397.083	147	90	0.370199	0.77642
LcbHLH14	Os04t0641700-00	0.233066	NaN	NaN	270	67.8333	202.167	40.5	52.5	0.20033	0.773956
LcbHLH13	Os09t0468700-00	0.350149	NaN	NaN	903	217.333	685.667	191.833	171.167	0.279776	0.787577
LcbHLH72	Os03t0205300-00	0.540668	NaN	NaN	894	198.583	695.417	267.917	154.083	0.385261	0.775913
LcbHLH71	Os03t0728900-00	0.394065	2.45039	0.160817	624	131.917	492.083	150.833	95.1667	0.30652	0.721415
LcbHLH72	Os07t0588400-00	0.554876	NaN	NaN	813	179.667	633.333	248.333	137.667	0.392105	0.766234
LcbHLH75	Os02t0795800-00	0.550083	NaN	NaN	774	191.667	582.333	227	148	0.389811	0.772174
LcbHLH80	Os12t0632600-00	0.620969	2.11317	0.293857	981	239.417	741.583	313.167	168.833	0.422295	0.705186
LcbHLH84	Os03t0205300-00	0.542011	NaN	NaN	912	205.667	706.333	272.583	161.417	0.385913	0.784846
LcbHLH84	Os07t0588400-00	0.440505	NaN	NaN	771	174.167	596.833	198.833	145.167	0.333147	0.833493
LcbHLH49	Os01t0286100-01	0.418671	2.24412	0.186564	957	217	740	237.417	154.583	0.320833	0.712366
LcbHLH49	Os05t0139100-01	0.542981	NaN	NaN	861	201.25	659.75	254.917	176.083	0.386384	0.874948
LcbHLH48	Os10t0575000-01	0.375227	2.36389	0.158733	1875	455.25	1419.75	419.167	326.833	0.29524	0.717921
LcbHLH47	Os02t0691500-01	0.364928	NaN	NaN	309	73.6667	235.333	68	56	0.288952	0.760181
LcbHLH34	Os06t0193400-01	0.676787	1.98618	0.340748	1218	294.75	923.25	411.583	205.417	0.445798	0.696918
LcbHLH30	Os08t0536800-01	0.44468	3.77283	0.117864	606	136	470	157.667	101.333	0.335461	0.745098
LcbHLH35	Os08t0506700-01	0.363047	NaN	NaN	1101	253.75	847.25	243.833	232.167	0.287794	0.914943
LcbHLH35	Os09t0487900-01	0.485051	NaN	NaN	1110	261	849	303.25	216.75	0.357185	0.83046
LcbHLH17	Os01t0235700-01	0.424388	NaN	NaN	1740	411.417	1328.58	430.583	314.417	0.324092	0.764229
LcbHLH24	Os01t0928000-01	0.495914	1.84984	0.268084	1104	264.083	839.917	304.75	181.25	0.362834	0.686336
LcbHLH21	Os04t0493100-01	0.496096	NaN	NaN	435	103.667	331.333	120.25	79.75	0.362928	0.769293
LcbHLH23	Os08t0536800-01	0.505327	2.18941	0.230805	609	134.833	474.167	174.333	95.6667	0.367663	0.709518
LcbHLH23	Os09t0510500-01	0.369495	4.90793	0.0752853	528	115.833	412.167	120.25	86.75	0.291751	0.748921
LcbHLH55	Os01t0286100-01	0.573782	NaN	NaN	1722	407.417	1314.58	527.167	328.833	0.401014	0.807118
LcbHLH55	Os05t0139100-01	0.647315	NaN	NaN	1428	349.833	1078.17	467.5	282.5	0.433606	0.807527
LcbHLH27	Os09t0455300-01	0.422685	2.24968	0.187887	681	166.75	514.25	166.167	118.833	0.323124	0.712644
LcbHLH60	Os10t0575000-01	0.260469	1.61939	0.160844	1491	369.667	1121.33	246.75	245.25	0.220051	0.663436
LcbHLH59	Os02t0691500-01	0.426892	1.76298	0.242142	927	227.333	699.667	227.75	154.25	0.325512	0.678519
LcbHLH61	Os04t0599300-01	0.395964	NaN	NaN	1137	256.917	880.083	270.75	193.25	0.307641	0.752189
LcbHLH3	Os01t0575200-01	0.78128	NaN	NaN	1248	297.333	950.667	461.417	228.583	0.485361	0.768778
LcbHLH2	Os01t0707500-01	0.628208	NaN	NaN	1074	259.75	814.25	346.417	202.583	0.425443	0.779917
LcbHLH4	Os03t0802900-01	0.32029	1.66896	0.19191	768	180.75	587.25	153.083	120.917	0.260678	0.668972
LcbHLH1	Os04t0618600-01	0.492948	1.70245	0.289552	537	118.833	418.167	151.083	79.9167	0.361299	0.672511
LcbHLH6	Os06t0613500-01	0.309143	NaN	NaN	471	110.5	360.5	91.3333	89.6667	0.253352	0.811463
LcbHLH4	Os07t0193800-01	0.304425	3.42556	0.0888689	615	136.417	478.583	119.75	101.25	0.250218	0.742211
LcbHLH5	Os08t0506700-01	0.270679	NaN	NaN	705	165.5	539.5	122.583	140.417	0.227217	0.848439
LcbHLH5	Os09t0487900-01	0.396767	NaN	NaN	714	167.667	546.333	168.333	139.667	0.308115	0.833002
LcbHLH8	Os01t0111500-01	0.523827	NaN	NaN	726	167.833	558.167	210.417	128.583	0.376978	0.766137
LcbHLH15	Os02t0747900-01	0.350669	2.52826	0.1387	255	59.8333	195.167	54.6667	43.3333	0.280102	0.724234
LcbHLH7	Os02t0705500-01	0.566253	NaN	NaN	1029	231.083	797.917	317.167	181.833	0.397493	0.786873
LcbHLH8	Os02t0710300-01	0.469655	2.90739	0.161538	723	172.917	550.083	192	127	0.349038	0.734458
LcbHLH13	Os03t0188400-01	0.354348	NaN	NaN	897	214.167	682.833	192.833	180.167	0.282402	0.841245
LcbHLH15	Os06t0226500-01	0.399509	NaN	NaN	255	59.6667	195.333	60.5	45.5	0.309727	0.76257
LcbHLH13	Os08t0483900-01	0.389172	NaN	NaN	942	227.833	714.167	216.833	186.167	0.303617	0.817118
LcbHLH11	Os09t0455300-01	0.414022	NaN	NaN	597	142.833	454.167	144.5	114.5	0.318165	0.801634
LcbHLH70	Os03t0725800-01	0.479648	NaN	NaN	972	231.667	740.333	262.333	188.667	0.354345	0.814388
LcbHLH74	Os06t0275600-01	0.514861	3.5246	0.146076	1107	247.25	859.75	320.25	183.75	0.372492	0.743175
LcbHLH74	Os09t0474100-01	0.525525	NaN	NaN	1089	243.583	845.417	319.417	195.583	0.377822	0.802942
LcbHLH77	Os01t0218100-01	0.502944	NaN	NaN	756	189.75	566.25	207.5	152.5	0.366446	0.803689
LcbHLH80	Os03t0725800-01	0.521371	NaN	NaN	1050	249.167	800.833	300.917	193.083	0.375754	0.774916
LcbHLH80	Os03t0671800-01	0.703027	3.21852	0.218432	1020	245.583	774.417	353.333	181.667	0.456257	0.739735
LcbHLH7	Os02t0705500-02	0.566253	NaN	NaN	1029	231.083	797.917	317.167	181.833	0.397493	0.786873
LcbHLH8	Os02t0710300-01	0.469655	2.90739	0.161538	723	172.917	550.083	192	127	0.349038	0.734458

## Sheet: TableS6
Table S6.LcbHLH cis-regulation elements
ID	LOCATION		CREs
LcbHLH91	457	463	MYB
LcbHLH91	1385	1379	MYB
LcbHLH91	807	813	ARE
LcbHLH91	927	933	ARE
LcbHLH91	769	763	MYB
LcbHLH91	1385	1379	MYB
LcbHLH91	457	463	Myb-binding site
LcbHLH91	500	491	G-box
LcbHLH91	500	510	G-box
LcbHLH91	414	404	I-box
LcbHLH90	255	261	Myb-binding site
LcbHLH90	594	588	Myb-binding site
LcbHLH90	511	517	ARE
LcbHLH90	988	994	ARE
LcbHLH90	1122	1128	ARE
LcbHLH90	1387	1381	ARE
LcbHLH90	182	176	MYB
LcbHLH90	255	261	MYB
LcbHLH90	594	588	MYB
LcbHLH90	720	714	MYB
LcbHLH90	744	738	MYB
LcbHLH90	583	592	TCA-element
LcbHLH90	641	647	ABRE
LcbHLH90	332	327	ABRE
LcbHLH90	641	636	ABRE
LcbHLH90	933	942	ABRE
LcbHLH90	935	929	ABRE
LcbHLH90	936	941	ABRE
LcbHLH90	641	635	ABRE
LcbHLH90	978	969	I-box
LcbHLH90	332	338	G-box
LcbHLH90	935	929	G-box
LcbHLH90	641	635	G-box
LcbHLH90	932	921	G-box
LcbHLH90	933	924	G-box
LcbHLH90	935	929	G-box
LcbHLH64	566	560	ARE
LcbHLH64	599	593	ARE
LcbHLH64	772	778	ARE
LcbHLH64	491	485	MYB
LcbHLH64	891	885	MYB
LcbHLH64	1386	1392	MYB
LcbHLH64	1044	1034	AT-rich
LcbHLH64	1204	1194	AT-rich
LcbHLH64	1268	1261	DRE1
LcbHLH64	1386	1392	MYB
LcbHLH88	1073	1079	ABRE
LcbHLH88	562	553	ABRE
LcbHLH88	564	570	ABRE
LcbHLH88	565	570	ABRE
LcbHLH88	1073	1068	ABRE
LcbHLH88	1115	1110	ABRE
LcbHLH88	1073	1067	ABRE
LcbHLH88	28	34	MYB
LcbHLH88	837	843	MYB
LcbHLH88	1282	1276	MYB
LcbHLH88	837	843	Myb-binding site
LcbHLH88	1282	1276	Myb-binding site
LcbHLH88	564	570	G-box
LcbHLH88	1070	1079	G-box
LcbHLH88	1073	1067	G-box
LcbHLH88	564	570	G-box
LcbHLH88	1115	1121	G-box
LcbHLH89	26	32	MYB
LcbHLH89	837	843	MYB
LcbHLH89	1282	1276	MYB
LcbHLH89	1073	1067	ABRE
LcbHLH89	561	552	ABRE
LcbHLH89	563	569	ABRE
LcbHLH89	564	569	ABRE
LcbHLH89	1073	1068	ABRE
LcbHLH89	1115	1110	ABRE
LcbHLH89	1073	1079	ABRE
LcbHLH89	837	843	Myb-binding site
LcbHLH89	1282	1276	Myb-binding site
LcbHLH89	563	569	G-box
LcbHLH89	1115	1121	G-box
LcbHLH89	563	569	G-box
LcbHLH89	1070	1079	G-box
LcbHLH89	1073	1067	G-box
LcbHLH83	253	259	MYB
LcbHLH83	422	428	MYB
LcbHLH83	688	682	MYB
LcbHLH83	89	84	ABRE
LcbHLH83	448	441	ABRE
LcbHLH83	253	259	Myb-binding site
LcbHLH83	334	340	MYB
LcbHLH83	620	614	MYB
LcbHLH83	89	95	G-box
LcbHLH83	620	614	MBS
LcbHLH79	381	387	ARE
LcbHLH79	73	79	MYB
LcbHLH79	321	327	MYB
LcbHLH79	1144	1138	MYB
LcbHLH79	1068	1074	DRE core
LcbHLH79	1189	1183	DRE core
LcbHLH79	644	653	TCA-element
LcbHLH79	138	132	MYB recognition site
LcbHLH79	1156	1162	MYB recognition site
LcbHLH79	321	327	Myb-binding site
LcbHLH79	138	144	CCAAT-box
LcbHLH79	1156	1150	CCAAT-box
LcbHLH79	164	158	MYB
LcbHLH79	164	158	MBS
LcbHLH79	280	290	I-box
LcbHLH79	474	465	I-box
LcbHLH79	830	840	I-box
LcbHLH71	280	274	CCAAT-box
LcbHLH71	257	251	MYB
LcbHLH71	734	740	MYB
LcbHLH71	305	311	Myb-binding site
LcbHLH71	544	538	MYB
LcbHLH71	280	286	MYB recognition site
LcbHLH71	44	34	TCA-element
LcbHLH71	222	228	MYB
LcbHLH71	257	251	MYB
LcbHLH71	305	311	MYB
LcbHLH71	734	740	MYB
LcbHLH71	695	689	ARE
LcbHLH71	756	750	ARE
LcbHLH71	1307	1313	ARE
LcbHLH71	1409	1403	ARE
LcbHLH71	86	77	ABRE
LcbHLH71	88	94	ABRE
LcbHLH71	89	94	ABRE
LcbHLH71	544	538	MBS
LcbHLH71	88	94	G-box
LcbHLH71	85	75	G-box
LcbHLH71	86	77	G-box
LcbHLH71	88	94	G-box
LcbHLH9	45	39	MYB
LcbHLH9	918	924	MYB
LcbHLH9	1254	1248	MYB
LcbHLH9	626	620	MYB recognition site
LcbHLH9	1013	1007	MYB recognition site
LcbHLH9	954	960	LTR
LcbHLH9	842	848	ARE
LcbHLH9	335	340	ABRE
LcbHLH9	784	789	ABRE
LcbHLH9	949	944	ABRE
LcbHLH9	45	39	MYB
LcbHLH9	626	632	CCAAT-box
LcbHLH9	1013	1019	CCAAT-box
LcbHLH9	918	924	Myb-binding site
LcbHLH9	1254	1248	Myb-binding site
LcbHLH9	334	328	G-box
LcbHLH9	783	777	G-box
LcbHLH9	946	936	G-box
LcbHLH9	949	955	G-box
LcbHLH12	1269	1263	MYB
LcbHLH12	109	103	CCAAT-box
LcbHLH12	1239	1233	CCAAT-box
LcbHLH12	200	191	ABRE
LcbHLH12	821	815	ABRE
LcbHLH12	822	827	ABRE
LcbHLH12	988	983	ABRE
LcbHLH12	83	89	ARE
LcbHLH12	750	744	ARE
LcbHLH12	1354	1348	ARE
LcbHLH12	898	892	DRE core
LcbHLH12	109	115	MYB recognition site
LcbHLH12	1239	1245	MYB recognition site
LcbHLH12	426	417	TCA-element
LcbHLH12	597	606	TCA-element
LcbHLH12	994	985	TCA-element
LcbHLH12	1291	1282	TCA-element
LcbHLH12	1269	1263	MBS
LcbHLH12	792	798	G-box
LcbHLH12	821	815	G-box
LcbHLH12	821	815	G-box
LcbHLH12	988	994	G-box
LcbHLH51	142	148	MYB
LcbHLH51	378	384	MYB
LcbHLH51	388	382	Myb-binding site
LcbHLH51	663	669	CCAAT-box
LcbHLH51	51	45	MYB
LcbHLH51	470	475	ABRE
LcbHLH51	532	537	ABRE
LcbHLH51	580	585	ABRE
LcbHLH51	610	619	ABRE
LcbHLH51	612	618	ABRE
LcbHLH51	613	618	ABRE
LcbHLH51	887	892	ABRE
LcbHLH51	1202	1196	ABRE
LcbHLH51	1203	1208	ABRE
LcbHLH51	932	938	ARE
LcbHLH51	990	984	ARE
LcbHLH51	575	581	LTR
LcbHLH51	663	657	MYB recognition site
LcbHLH51	68	74	DRE core
LcbHLH51	51	45	MYB
LcbHLH51	388	382	MYB
LcbHLH51	674	683	I-box
LcbHLH51	378	384	MBS
LcbHLH51	467	477	G-box
LcbHLH51	469	463	G-box
LcbHLH51	529	537	G-box
LcbHLH51	608	620	G-box
LcbHLH51	609	620	G-box
LcbHLH51	610	601	G-box
LcbHLH51	611	620	G-box
LcbHLH51	612	618	G-box
LcbHLH51	1202	1196	G-box
LcbHLH51	531	525	G-box
LcbHLH51	579	573	G-box
LcbHLH51	612	618	G-box
LcbHLH51	886	880	G-box
LcbHLH51	1202	1196	G-box
LcbHLH50	980	974	Myb-binding site
LcbHLH50	1429	1435	ABRE
LcbHLH50	1429	1423	ABRE
LcbHLH50	84	79	ABRE
LcbHLH50	172	181	ABRE
LcbHLH50	174	180	ABRE
LcbHLH50	175	180	ABRE
LcbHLH50	235	241	ABRE
LcbHLH50	236	241	ABRE
LcbHLH50	1430	1435	ABRE
LcbHLH50	686	695	TCA-element
LcbHLH50	204	210	MYB
LcbHLH50	789	783	MYB
LcbHLH50	980	974	MYB
LcbHLH50	667	673	DRE core
LcbHLH50	207	217	I-box
LcbHLH50	84	90	G-box
LcbHLH50	172	163	G-box
LcbHLH50	173	182	G-box
LcbHLH50	174	180	G-box
LcbHLH50	235	241	G-box
LcbHLH50	1429	1435	G-box
LcbHLH50	174	180	G-box
LcbHLH50	235	241	G-box
LcbHLH32	135	129	ARE
LcbHLH32	1289	1283	ARE
LcbHLH32	1327	1333	ARE
LcbHLH32	173	179	ABRE
LcbHLH32	174	179	ABRE
LcbHLH32	205	210	ABRE
LcbHLH32	1212	1207	ABRE
LcbHLH32	95	86	I-box
LcbHLH32	173	179	G-box
LcbHLH32	204	198	G-box
LcbHLH32	172	180	G-box
LcbHLH32	173	179	G-box
LcbHLH32	1212	1218	G-box
LcbHLH53	1417	1423	ABRE
LcbHLH53	1447	1453	ABRE
LcbHLH53	638	629	ABRE
LcbHLH53	1124	1133	ABRE
LcbHLH53	1126	1120	ABRE
LcbHLH53	1127	1132	ABRE
LcbHLH53	1307	1312	ABRE
LcbHLH53	1417	1412	ABRE
LcbHLH53	1447	1442	ABRE
LcbHLH53	1417	1411	ABRE
LcbHLH53	1447	1441	ABRE
LcbHLH53	9	15	ARE
LcbHLH53	94	100	MYB
LcbHLH53	414	408	MYB
LcbHLH53	575	569	MYB
LcbHLH53	707	701	MYB
LcbHLH53	1159	1153	MYB
LcbHLH53	414	408	Myb-binding site
LcbHLH53	575	569	Myb-binding site
LcbHLH53	1159	1153	MYB
LcbHLH53	1126	1120	G-box
LcbHLH53	1417	1411	G-box
LcbHLH53	1447	1441	G-box
LcbHLH53	1126	1120	G-box
LcbHLH53	1306	1300	G-box
LcbHLH52	451	445	Myb-binding site
LcbHLH52	769	775	CCAAT-box
LcbHLH52	299	293	LTR
LcbHLH52	714	708	ARE
LcbHLH52	451	445	MYB
LcbHLH52	1087	1093	MYB
LcbHLH52	769	763	MYB recognition site
LcbHLH52	1045	1036	TCA-element
LcbHLH52	1245	1254	TCA-element
LcbHLH52	130	135	ABRE
LcbHLH52	377	382	ABRE
LcbHLH52	852	846	ABRE
LcbHLH52	853	858	ABRE
LcbHLH52	1100	1094	ABRE
LcbHLH52	1101	1106	ABRE
LcbHLH52	376	370	G-box
LcbHLH52	852	846	G-box
LcbHLH52	1100	1094	G-box
LcbHLH52	129	123	G-box
LcbHLH52	852	846	G-box
LcbHLH52	1100	1094	G-box
LcbHLH62	63	58	ABRE
LcbHLH62	709	715	ABRE
LcbHLH62	710	715	ABRE
LcbHLH62	1389	1398	TCA-element
LcbHLH62	124	130	ARE
LcbHLH62	709	715	G-box
LcbHLH62	63	69	G-box
LcbHLH62	709	715	G-box
LcbHLH63	70	65	ABRE
LcbHLH63	228	233	ABRE
LcbHLH63	716	722	ABRE
LcbHLH63	717	722	ABRE
LcbHLH63	1397	1406	TCA-element
LcbHLH63	131	137	ARE
LcbHLH63	716	722	G-box
LcbHLH63	70	76	G-box
LcbHLH63	227	221	G-box
LcbHLH63	716	722	G-box
LcbHLH16	1262	1256	MYB
LcbHLH16	828	834	CCAAT-box
LcbHLH16	1486	1480	CCAAT-box
LcbHLH16	235	241	ABRE
LcbHLH16	149	140	ABRE
LcbHLH16	151	157	ABRE
LcbHLH16	152	157	ABRE
LcbHLH16	230	225	ABRE
LcbHLH16	236	241	ABRE
LcbHLH16	1125	1132	ABRE
LcbHLH16	235	229	ABRE
LcbHLH16	1227	1233	MYB
LcbHLH16	1262	1256	MYB
LcbHLH16	828	822	MYB recognition site
LcbHLH16	1486	1492	MYB recognition site
LcbHLH16	360	351	I-box
LcbHLH16	150	158	G-box
LcbHLH16	151	157	G-box
LcbHLH16	234	226	G-box
LcbHLH16	235	241	G-box
LcbHLH16	1495	1501	G-box
LcbHLH16	151	157	G-box
LcbHLH16	230	236	G-box
LcbHLH58	184	190	MYB
LcbHLH58	697	691	MYB
LcbHLH58	203	209	ARE
LcbHLH58	240	246	ARE
LcbHLH58	283	289	ARE
LcbHLH58	748	754	ARE
LcbHLH58	231	237	LTR
LcbHLH58	1412	1406	ABRE
LcbHLH58	1412	1418	ABRE
LcbHLH58	1412	1407	ABRE
LcbHLH58	1412	1406	G-box
LcbHLH74	486	492	Myb-binding site
LcbHLH74	1416	1410	MYB
LcbHLH74	675	681	MYB
LcbHLH74	799	793	MYB
LcbHLH74	837	843	ARE
LcbHLH74	957	963	ARE
LcbHLH74	486	492	MYB
LcbHLH74	1416	1410	MYB
LcbHLH74	1099	1094	ABRE
LcbHLH74	1099	1105	ABRE
LcbHLH74	1099	1093	ABRE
LcbHLH74	675	681	MBS
LcbHLH74	443	433	I-box
LcbHLH74	529	539	G-box
LcbHLH74	529	520	G-box
LcbHLH74	1099	1093	G-box
LcbHLH1	922	916	DRE core
LcbHLH1	1364	1358	MYB
LcbHLH1	22	16	MYB recognition site
LcbHLH1	43	49	MYB recognition site
LcbHLH1	564	570	MYB recognition site
LcbHLH1	799	793	MYB recognition site
LcbHLH1	829	823	MYB recognition site
LcbHLH1	1000	1006	MYB recognition site
LcbHLH1	429	435	ABRE
LcbHLH1	430	435	ABRE
LcbHLH1	677	683	ABRE
LcbHLH1	678	683	ABRE
LcbHLH1	1132	1126	ABRE
LcbHLH1	1133	1138	ABRE
LcbHLH1	22	28	CCAAT-box
LcbHLH1	43	37	CCAAT-box
LcbHLH1	564	558	CCAAT-box
LcbHLH1	799	805	CCAAT-box
LcbHLH1	829	835	CCAAT-box
LcbHLH1	1000	994	CCAAT-box
LcbHLH1	1364	1358	Myb-binding site
LcbHLH1	429	435	G-box
LcbHLH1	677	683	G-box
LcbHLH1	1132	1126	G-box
LcbHLH1	429	435	G-box
LcbHLH1	676	684	G-box
LcbHLH1	677	683	G-box
LcbHLH1	1132	1126	G-box
LcbHLH22	1272	1278	MYB
LcbHLH22	397	391	MYB
LcbHLH22	1015	1009	MYB
LcbHLH22	359	365	LTR
LcbHLH22	686	692	ARE
LcbHLH22	820	826	ARE
LcbHLH22	1142	1136	ARE
LcbHLH22	1272	1278	MYB
LcbHLH22	414	409	ABRE
LcbHLH22	414	420	ABRE
LcbHLH22	414	408	ABRE
LcbHLH22	351	342	I-box
LcbHLH22	278	272	G-box
LcbHLH22	414	408	G-box
LcbHLH20	458	452	MYB
LcbHLH20	1344	1350	MYB
LcbHLH20	1357	1351	MYB
LcbHLH20	374	380	MYB
LcbHLH20	1072	1078	MYB
LcbHLH20	1331	1337	MYB
LcbHLH20	480	470	AT-rich
LcbHLH20	828	834	ARE
LcbHLH20	1171	1165	ARE
LcbHLH20	374	380	MYB
LcbHLH20	528	534	MYB
LcbHLH20	1072	1078	MYB
LcbHLH20	1123	1117	MYB
LcbHLH20	1156	1162	MYB
LcbHLH20	1331	1337	MYB
LcbHLH20	281	272	TCA-element
LcbHLH20	1088	1097	TCA-element
LcbHLH20	458	452	MBS
LcbHLH20	1344	1350	MBS
LcbHLH81	1058	1064	CCAAT-box
LcbHLH81	229	223	MYB
LcbHLH81	48	42	MYB
LcbHLH81	1099	1105	MYB
LcbHLH81	1279	1273	MYB
LcbHLH81	1489	1495	MYB
LcbHLH81	1058	1052	MYB recognition site
LcbHLH81	44	50	MYB
LcbHLH81	229	223	MYB
LcbHLH81	1112	1106	MYB
LcbHLH81	1273	1279	MYB
LcbHLH81	912	918	ARE
LcbHLH81	1368	1374	LTR
LcbHLH81	265	270	ABRE
LcbHLH81	48	42	MBS
LcbHLH81	1099	1105	MBS
LcbHLH81	1489	1495	MBS
LcbHLH81	723	733	G-box
LcbHLH81	264	258	G-box
LcbHLH80	385	379	LTR
LcbHLH80	403	409	ARE
LcbHLH80	813	807	MYB
LcbHLH80	254	260	MYB recognition site
LcbHLH80	763	754	TCA-element
LcbHLH80	215	220	ABRE
LcbHLH80	457	463	ABRE
LcbHLH80	458	463	ABRE
LcbHLH80	474	469	ABRE
LcbHLH80	487	492	ABRE
LcbHLH80	1008	1017	ABRE
LcbHLH80	1011	1016	ABRE
LcbHLH80	1105	1100	ABRE
LcbHLH80	1284	1278	ABRE
LcbHLH80	1285	1290	ABRE
LcbHLH80	214	208	ABRE
LcbHLH80	486	480	ABRE
LcbHLH80	1010	1004	ABRE
LcbHLH80	1105	1111	ABRE
LcbHLH80	214	220	ABRE
LcbHLH80	486	492	ABRE
LcbHLH80	1010	1016	ABRE
LcbHLH80	1105	1099	ABRE
LcbHLH80	813	807	MYB
LcbHLH80	254	248	CCAAT-box
LcbHLH80	6	12	MYB
LcbHLH80	1371	1377	MYB
LcbHLH80	457	463	G-box
LcbHLH80	474	480	G-box
LcbHLH80	1284	1278	G-box
LcbHLH80	214	220	G-box
LcbHLH80	456	464	G-box
LcbHLH80	457	463	G-box
LcbHLH80	486	492	G-box
LcbHLH80	1010	1016	G-box
LcbHLH80	1105	1099	G-box
LcbHLH80	1284	1278	G-box
LcbHLH80	585	576	I-box
LcbHLH80	586	595	I-box
LcbHLH80	728	737	I-box
LcbHLH47	605	596	TCA-element
LcbHLH47	1073	1079	MYB
LcbHLH47	1232	1226	MYB
LcbHLH47	1098	1092	LTR
LcbHLH47	614	620	ARE
LcbHLH47	735	741	ARE
LcbHLH47	169	164	ABRE
LcbHLH47	640	635	ABRE
LcbHLH47	1287	1282	ABRE
LcbHLH47	1359	1364	ABRE
LcbHLH47	443	434	TCA-element
LcbHLH47	1073	1079	Myb-binding site
LcbHLH47	1266	1260	MYB
LcbHLH47	169	175	G-box
LcbHLH47	227	221	G-box
LcbHLH47	640	646	G-box
LcbHLH47	1287	1293	G-box
LcbHLH47	1358	1352	G-box
LcbHLH47	1065	1055	I-box
LcbHLH70	292	283	TCA-element
LcbHLH70	58	64	ABRE
LcbHLH70	59	64	ABRE
LcbHLH70	78	84	ABRE
LcbHLH70	79	84	ABRE
LcbHLH70	473	478	ABRE
LcbHLH70	134	128	MYB
LcbHLH70	403	397	MYB
LcbHLH70	744	738	MYB
LcbHLH70	1191	1185	MYB
LcbHLH70	1198	1204	LTR
LcbHLH70	861	855	ARE
LcbHLH70	902	896	ARE
LcbHLH70	1105	1111	MYB
LcbHLH70	403	397	MYB
LcbHLH70	744	738	MYB
LcbHLH70	1191	1185	MYB
LcbHLH70	134	128	Myb-binding site
LcbHLH70	58	64	G-box
LcbHLH70	75	84	G-box
LcbHLH70	78	84	G-box
LcbHLH70	58	64	G-box
LcbHLH70	78	84	G-box
LcbHLH70	472	466	G-box
LcbHLH69	1175	1169	LTR
LcbHLH69	1251	1245	LTR
LcbHLH69	342	336	ARE
LcbHLH69	262	256	MYB
LcbHLH69	464	458	MYB
LcbHLH69	1236	1230	MYB
LcbHLH69	769	760	TCA-element
LcbHLH69	790	781	TCA-element
LcbHLH69	1168	1177	TCA-element
LcbHLH69	405	400	ABRE
LcbHLH69	609	618	ABRE
LcbHLH69	611	617	ABRE
LcbHLH69	612	617	ABRE
LcbHLH69	1236	1230	Myb-binding site
LcbHLH69	262	256	MYB
LcbHLH69	233	239	MYB
LcbHLH69	405	411	G-box
LcbHLH69	611	617	G-box
LcbHLH69	609	600	G-box
LcbHLH69	610	619	G-box
LcbHLH69	611	617	G-box
LcbHLH69	866	875	I-box
LcbHLH19	1310	1304	LTR
LcbHLH19	504	498	ARE
LcbHLH19	586	592	ARE
LcbHLH19	783	777	ARE
LcbHLH19	1042	1036	ARE
LcbHLH19	1176	1170	ARE
LcbHLH19	1274	1280	ARE
LcbHLH19	395	389	MYB recognition site
LcbHLH19	448	454	MYB
LcbHLH19	1018	1024	MYB
LcbHLH19	1020	1030	AT-rich
LcbHLH19	254	248	ABRE
LcbHLH19	1287	1293	ABRE
LcbHLH19	254	260	ABRE
LcbHLH19	1287	1281	ABRE
LcbHLH19	1018	1024	Myb-binding site
LcbHLH19	395	401	CCAAT-box
LcbHLH19	255	260	ABRE
LcbHLH19	1287	1282	ABRE
LcbHLH19	1364	1358	ABRE
LcbHLH19	1365	1370	ABRE
LcbHLH19	416	422	MYB
LcbHLH19	597	591	MYB
LcbHLH19	1364	1358	G-box
LcbHLH19	252	262	G-box
LcbHLH19	254	260	G-box
LcbHLH19	1287	1281	G-box
LcbHLH19	1363	1355	G-box
LcbHLH19	1364	1358	G-box
LcbHLH19	416	422	MBS
LcbHLH82	650	644	MYB
LcbHLH82	1078	1072	MYB
LcbHLH82	913	907	LTR
LcbHLH82	990	984	LTR
LcbHLH82	488	494	ARE
LcbHLH82	1118	1112	ARE
LcbHLH82	179	173	ABRE
LcbHLH82	179	174	ABRE
LcbHLH82	179	185	ABRE
LcbHLH82	650	644	MYB
LcbHLH82	1078	1072	MYB
LcbHLH82	565	559	MYB
LcbHLH82	179	173	G-box
LcbHLH82	388	394	G-box
LcbHLH82	119	128	I-box
LcbHLH42	414	420	MYB
LcbHLH42	1324	1333	AT-rich
LcbHLH42	450	456	Myb-binding site
LcbHLH42	848	842	Myb-binding site
LcbHLH42	140	146	ABRE
LcbHLH42	141	146	ABRE
LcbHLH42	380	385	ABRE
LcbHLH42	1182	1189	ABRE
LcbHLH42	450	456	MYB
LcbHLH42	848	842	MYB
LcbHLH42	102	111	TCA-element
LcbHLH42	793	802	TCA-element
LcbHLH42	509	515	ARE
LcbHLH42	868	874	LTR
LcbHLH42	924	930	LTR
LcbHLH42	140	146	G-box
LcbHLH42	379	373	G-box
LcbHLH42	140	146	G-box
LcbHLH33	248	254	MYB
LcbHLH33	364	358	MYB
LcbHLH33	859	865	CCAAT-box
LcbHLH33	1190	1196	CCAAT-box
LcbHLH33	1239	1245	CCAAT-box
LcbHLH33	1404	1410	CCAAT-box
LcbHLH33	1334	1328	ABRE
LcbHLH33	1334	1340	ABRE
LcbHLH33	1419	1425	LTR
LcbHLH33	1000	994	ARE
LcbHLH33	1166	1160	ARE
LcbHLH33	1283	1289	ARE
LcbHLH33	248	254	MYB
LcbHLH33	364	358	MYB
LcbHLH33	432	426	MYB
LcbHLH33	743	737	MYB
LcbHLH33	859	853	MYB recognition site
LcbHLH33	1190	1184	MYB recognition site
LcbHLH33	1239	1233	MYB recognition site
LcbHLH33	1404	1398	MYB recognition site
LcbHLH33	79	73	MYB
LcbHLH33	995	987	ABRE
LcbHLH33	573	564	ABRE
LcbHLH33	575	581	ABRE
LcbHLH33	576	581	ABRE
LcbHLH33	996	990	ABRE
LcbHLH33	997	1002	ABRE
LcbHLH33	1335	1340	ABRE
LcbHLH33	1340	1331	ABRE
LcbHLH33	1452	1445	ABRE
LcbHLH33	573	564	G-box
LcbHLH33	575	581	G-box
LcbHLH33	991	980.5	G-box
LcbHLH33	994	1003	G-box
LcbHLH33	996	990	G-box
LcbHLH33	1172	1166	G-box
LcbHLH33	1332	1323	G-box
LcbHLH33	1334	1340	G-box
LcbHLH33	575	581	G-box
LcbHLH33	996	990	G-box
LcbHLH56	1118	1112	ABRE
LcbHLH56	57	52	ABRE
LcbHLH56	440	435	ABRE
LcbHLH56	591	584	ABRE
LcbHLH56	1119	1124	ABRE
LcbHLH56	1384	1379	ABRE
LcbHLH56	1393	1387	ABRE
LcbHLH56	1394	1399	ABRE
LcbHLH56	1118	1124	ABRE
LcbHLH56	604	610	ARE
LcbHLH56	927	933	ARE
LcbHLH56	353	347	MYB
LcbHLH56	1087	1081	MYB
LcbHLH56	1491	1485	MYB
LcbHLH56	950	956	MYB
LcbHLH56	440	446	G-box
LcbHLH56	1118	1124	G-box
LcbHLH56	1393	1387	G-box
LcbHLH56	57	63	G-box
LcbHLH56	1384	1390	G-box
LcbHLH56	1393	1387	G-box
LcbHLH56	950	956	MBS
LcbHLH78	712	706	CCAAT-box
LcbHLH78	1256	1250	CCAAT-box
LcbHLH78	339	345	Myb-binding site
LcbHLH78	433	439	Myb-binding site
LcbHLH78	712	718	MYB recognition site
LcbHLH78	1256	1262	MYB recognition site
LcbHLH78	756	765	TCA-element
LcbHLH78	339	345	MYB
LcbHLH78	433	439	MYB
LcbHLH78	1244	1238	MYB
LcbHLH78	1168	1174	DRE core
LcbHLH78	493	499	ARE
LcbHLH78	392	402	I-box
LcbHLH78	586	577	I-box
LcbHLH78	942	952	I-box
LcbHLH78	1292	1282	I-box
LcbHLH55	133	139	MYB
LcbHLH55	581	575	MYB
LcbHLH55	681	687	MYB
LcbHLH55	687	681	MYB
LcbHLH55	1249	1243	MYB
LcbHLH55	351	341	TCA-element
LcbHLH55	751	757	MYB recognition site
LcbHLH55	826	832	ARE
LcbHLH55	1114	1108	ARE
LcbHLH55	1316	1310	ARE
LcbHLH55	323	314	ABRE
LcbHLH55	325	331	ABRE
LcbHLH55	326	331	ABRE
LcbHLH55	594	603	ABRE
LcbHLH55	607	598	ABRE
LcbHLH55	609	615	ABRE
LcbHLH55	610	615	ABRE
LcbHLH55	133	139	MYB
LcbHLH55	681	687	MYB
LcbHLH55	687	681	MYB
LcbHLH55	751	745	CCAAT-box
LcbHLH55	581	575	Myb-binding site
LcbHLH55	325	331	G-box
LcbHLH55	609	615	G-box
LcbHLH55	324	332	G-box
LcbHLH55	325	331	G-box
LcbHLH55	609	615	G-box
LcbHLH55	1065	1059	G-box
LcbHLH55	152	160	I-box
LcbHLH23	93	99	MYB
LcbHLH23	182	188	MYB
LcbHLH23	684	678	MYB
LcbHLH23	341	332	TCA-element
LcbHLH23	1124	1130	ARE
LcbHLH23	453	447	ABRE
LcbHLH23	453	459	ABRE
LcbHLH23	451	443	ABRE
LcbHLH23	453	448	ABRE
LcbHLH23	1128	1123	ABRE
LcbHLH23	1416	1423	ABRE
LcbHLH23	93	99	MYB
LcbHLH23	182	188	Myb-binding site
LcbHLH23	451	443	ABRE
LcbHLH23	1128	1134	G-box
LcbHLH23	453	447	G-box
LcbHLH23	1028	1034	G-box
LcbHLH23	175	166	I-box
LcbHLH23	1128	1119	I-box
LcbHLH24	594	600	MYB
LcbHLH24	766	772	ABRE
LcbHLH24	1044	1050	ABRE
LcbHLH24	767	772	ABRE
LcbHLH24	878	871	ABRE
LcbHLH24	1045	1050	ABRE
LcbHLH24	1147	1138	ABRE
LcbHLH24	1149	1143	ABRE
LcbHLH24	1150	1155	ABRE
LcbHLH24	766	760	ABRE
LcbHLH24	1044	1038	ABRE
LcbHLH24	354	360	MYB
LcbHLH24	79	70	TCA-element
LcbHLH24	1020	1011	TCA-element
LcbHLH24	1459	1465	ARE
LcbHLH24	594	600	MBS
LcbHLH24	766	772	G-box
LcbHLH24	1044	1050	G-box
LcbHLH24	1147	1156	G-box
LcbHLH24	1149	1143	G-box
LcbHLH24	1219	1213	G-box
LcbHLH24	1149	1143	G-box
LcbHLH40	177	183	ABRE
LcbHLH40	178	183	ABRE
LcbHLH40	560	565	ABRE
LcbHLH40	1146	1151	ABRE
LcbHLH40	1012	1018	ARE
LcbHLH40	1186	1180	DRE core
LcbHLH40	563	557	MYB
LcbHLH40	598	592	MYB
LcbHLH40	1213	1207	MYB
LcbHLH40	1225	1219	MYB
LcbHLH40	384	375	TCA-element
LcbHLH40	533	539	MYB
LcbHLH40	1213	1207	Myb-binding site
LcbHLH40	1225	1219	Myb-binding site
LcbHLH40	563	557	MYB
LcbHLH40	598	592	MYB
LcbHLH40	177	183	G-box
LcbHLH40	411	402	G-box
LcbHLH40	177	183	G-box
LcbHLH40	559	553	G-box
LcbHLH40	1145	1139	G-box
LcbHLH10	606	600	MYB
LcbHLH10	726	732	MYB
LcbHLH10	350	356	MYB
LcbHLH10	131	137	Myb-binding site
LcbHLH10	447	441	Myb-binding site
LcbHLH10	370	379	ABRE
LcbHLH10	372	378	ABRE
LcbHLH10	373	378	ABRE
LcbHLH10	303	312	TCA-element
LcbHLH10	371	379	ABRE
LcbHLH10	1168	1177	TCA-element
LcbHLH10	131	137	MYB
LcbHLH10	350	356	MYB
LcbHLH10	447	441	MYB
LcbHLH10	740	746	MYB
LcbHLH10	936	942	MYB
LcbHLH10	1073	1079	DRE core
LcbHLH10	401	407	LTR
LcbHLH10	1083	1077	LTR
LcbHLH10	778	784	ARE
LcbHLH10	1156	1162	ARE
LcbHLH10	1197	1203	ARE
LcbHLH10	767	757	I-box
LcbHLH10	726	732	MBS
LcbHLH10	370	379	G-box
LcbHLH10	372	378	G-box
LcbHLH10	372	378	G-box
LcbHLH21	284	290	Myb-binding site
LcbHLH21	1306	1300	MYB
LcbHLH21	821	827	CCAAT-box
LcbHLH21	364	370	ARE
LcbHLH21	1154	1148	LTR
LcbHLH21	284	290	MYB
LcbHLH21	1306	1300	MYB
LcbHLH21	821	815	MYB recognition site
LcbHLH21	554	545	ABRE
LcbHLH21	709	700	ABRE
LcbHLH21	951	942	ABRE
LcbHLH21	953	947	ABRE
LcbHLH21	954	959	ABRE
LcbHLH21	457	448	I-box
LcbHLH21	953	947	G-box
LcbHLH21	640	646	G-box
LcbHLH21	953	947	G-box
LcbHLH54	337	346	TCA-element
LcbHLH54	520	526	MYB
LcbHLH54	1295	1289	MYB
LcbHLH54	1310	1304	MYB
LcbHLH54	1486	1492	MYB
LcbHLH54	191	197	ABRE
LcbHLH54	192	197	ABRE
LcbHLH54	205	196	ABRE
LcbHLH54	716	721	ABRE
LcbHLH54	822	812	ABRE
LcbHLH54	824	818	ABRE
LcbHLH54	825	830	ABRE
LcbHLH54	947	937	ABRE
LcbHLH54	949	943	ABRE
LcbHLH54	950	955	ABRE
LcbHLH54	520	526	Myb-binding site
LcbHLH54	1310	1304	Myb-binding site
LcbHLH54	1486	1492	Myb-binding site
LcbHLH54	1416	1410	MYB
LcbHLH54	191	197	G-box
LcbHLH54	715	709	G-box
LcbHLH54	824	818	G-box
LcbHLH54	949	943	G-box
LcbHLH54	191	197	G-box
LcbHLH54	824	818	G-box
LcbHLH54	949	943	G-box
LcbHLH54	252	261	I-box
LcbHLH54	513	504	I-box
LcbHLH84	169	175	MYB
LcbHLH84	1332	1338	Myb-binding site
LcbHLH84	873	867	MYB
LcbHLH84	9	15	MYB
LcbHLH84	18	24	MYB
LcbHLH84	169	175	MYB
LcbHLH84	1332	1338	MYB
LcbHLH84	403	412	TCA-element
LcbHLH84	2	8	ARE
LcbHLH84	997	991	ARE
LcbHLH84	605	614	TCA-element
LcbHLH84	465	460	ABRE
LcbHLH84	465	471	G-box
LcbHLH85	656	665	TCA-element
LcbHLH85	587	582	ABRE
LcbHLH85	125	131	ARE
LcbHLH85	1048	1042	ARE
LcbHLH85	132	138	MYB
LcbHLH85	141	147	MYB
LcbHLH85	292	298	MYB
LcbHLH85	1383	1389	MYB
LcbHLH85	525	534	TCA-element
LcbHLH85	924	918	MYB
LcbHLH85	1383	1389	Myb-binding site
LcbHLH85	292	298	MYB
LcbHLH85	587	593	G-box
LcbHLH72	260	266	Myb-binding site
LcbHLH72	881	875	MYB
LcbHLH72	1373	1367	MYB
LcbHLH72	18	12	ARE
LcbHLH72	260	266	MYB
LcbHLH72	715	709	MYB
LcbHLH72	1435	1441	MYB
LcbHLH72	471	480	TCA-element
LcbHLH72	736	745	TCA-element
LcbHLH72	1137	1127	AT-rich
LcbHLH72	1033	1028	ABRE
LcbHLH72	881	875	MBS
LcbHLH72	1373	1367	MBS
LcbHLH72	1033	1039	G-box
LcbHLH8	140	146	MYB
LcbHLH8	699	705	MYB
LcbHLH8	134	140	ARE
LcbHLH8	812	818	LTR
LcbHLH8	1010	1004	ABRE
LcbHLH8	1011	1016	ABRE
LcbHLH8	1389	1398	TCA-element
LcbHLH8	140	146	MYB
LcbHLH8	439	433	MYB
LcbHLH8	1010	1004	G-box
LcbHLH8	1010	1004	G-box
LcbHLH17	666	660	ABRE
LcbHLH17	766	772	ABRE
LcbHLH17	976	970	ABRE
LcbHLH17	1175	1181	ABRE
LcbHLH17	549	558	ABRE
LcbHLH17	552	557	ABRE
LcbHLH17	666	661	ABRE
LcbHLH17	681	686	ABRE
LcbHLH17	750	744	ABRE
LcbHLH17	751	756	ABRE
LcbHLH17	767	772	ABRE
LcbHLH17	976	971	ABRE
LcbHLH17	1150	1155	ABRE
LcbHLH17	1176	1181	ABRE
LcbHLH17	666	672	ABRE
LcbHLH17	766	760	ABRE
LcbHLH17	976	982	ABRE
LcbHLH17	1175	1169	ABRE
LcbHLH17	523	529	MYB
LcbHLH17	871	865	MYB
LcbHLH17	1038	1044	MYB
LcbHLH17	1053	1059	MYB
LcbHLH17	1059	1053	MYB
LcbHLH17	362	356	ARE
LcbHLH17	516	522	ARE
LcbHLH17	577	583	MYB
LcbHLH17	1079	1073	MYB
LcbHLH17	1053	1059	MYB
LcbHLH17	1059	1053	MYB
LcbHLH17	666	660	G-box
LcbHLH17	678	686	G-box
LcbHLH17	750	744	G-box
LcbHLH17	766	772	G-box
LcbHLH17	976	970	G-box
LcbHLH17	1149	1143	G-box
LcbHLH17	1175	1181	G-box
LcbHLH17	1491	1497	G-box
LcbHLH17	551	545	G-box
LcbHLH17	680	674	G-box
LcbHLH17	750	744	G-box
LcbHLH13	1113	1119	Myb-binding site
LcbHLH13	543	537	MYB
LcbHLH13	833	827	CCAAT-box
LcbHLH13	419	425	ABRE
LcbHLH13	653	659	ABRE
LcbHLH13	419	414	ABRE
LcbHLH13	653	648	ABRE
LcbHLH13	663	669	ABRE
LcbHLH13	664	669	ABRE
LcbHLH13	1079	1074	ABRE
LcbHLH13	1246	1240	ABRE
LcbHLH13	1247	1252	ABRE
LcbHLH13	890	880	AT-rich
LcbHLH13	419	413	ABRE
LcbHLH13	653	647	ABRE
LcbHLH13	1328	1322	ARE
LcbHLH13	1314	1320	LTR
LcbHLH13	543	537	MYB
LcbHLH13	962	968	MYB
LcbHLH13	1113	1119	MYB
LcbHLH13	1177	1183	MYB
LcbHLH13	833	839	MYB recognition site
LcbHLH13	419	413	G-box
LcbHLH13	653	647	G-box
LcbHLH13	663	669	G-box
LcbHLH13	1079	1085	G-box
LcbHLH13	1246	1240	G-box
LcbHLH13	663	669	G-box
LcbHLH13	1246	1240	G-box
LcbHLH44	572	578	MYB
LcbHLH44	1007	1013	MYB
LcbHLH44	1100	1094	MYB
LcbHLH44	15	9	CCAAT-box
LcbHLH44	478	485	ABRE
LcbHLH44	775	780	ABRE
LcbHLH44	496	490	ARE
LcbHLH44	504	510	MYB
LcbHLH44	572	578	MYB
LcbHLH44	1007	1013	MYB
LcbHLH44	1100	1094	MYB
LcbHLH44	946	937	TCA-element
LcbHLH44	15	21	MYB recognition site
LcbHLH44	578	587	I-box
LcbHLH44	774	768	G-box
LcbHLH43	111	105	Myb-binding site
LcbHLH43	862	856	Myb-binding site
LcbHLH43	1397	1391	Myb-binding site
LcbHLH43	835	829	MYB
LcbHLH43	111	105	MYB
LcbHLH43	597	603	MYB
LcbHLH43	862	856	MYB
LcbHLH43	1397	1391	MYB
LcbHLH43	471	465	LTR
LcbHLH43	226	231	ABRE
LcbHLH43	1264	1258	ABRE
LcbHLH43	1265	1270	ABRE
LcbHLH43	1334	1329	ABRE
LcbHLH43	835	829	MBS
LcbHLH43	225	219	G-box
LcbHLH43	1264	1258	G-box
LcbHLH43	1334	1340	G-box
LcbHLH43	1264	1258	G-box
LcbHLH57	795	789	ABRE
LcbHLH57	796	801	ABRE
LcbHLH57	1082	1087	ABRE
LcbHLH57	284	290	MYB
LcbHLH57	438	444	MYB
LcbHLH57	1244	1238	MYB
LcbHLH57	450	444	DRE core
LcbHLH57	583	589	MYB recognition site
LcbHLH57	78	69	TCA-element
LcbHLH57	500	509	TCA-element
LcbHLH57	441	435	MYB
LcbHLH57	438	444	Myb-binding site
LcbHLH57	1244	1238	Myb-binding site
LcbHLH57	583	577	CCAAT-box
LcbHLH57	794	786	G-box
LcbHLH57	795	789	G-box
LcbHLH57	1081	1075	G-box
LcbHLH57	795	789	G-box
LcbHLH57	903	894	I-box
LcbHLH57	441	435	MBS
LcbHLH87	48	54	MYB
LcbHLH87	126	120	MYB
LcbHLH87	293	299	MYB
LcbHLH87	834	828	ARE
LcbHLH87	1127	1133	ARE
LcbHLH87	367	376	TCA-element
LcbHLH87	635	641	ABRE
LcbHLH87	636	641	ABRE
LcbHLH87	896	905	ABRE
LcbHLH87	898	892	ABRE
LcbHLH87	899	904	ABRE
LcbHLH87	126	120	Myb-binding site
LcbHLH87	293	299	Myb-binding site
LcbHLH87	635	641	G-box
LcbHLH87	898	892	G-box
LcbHLH87	635	641	G-box
LcbHLH87	895	884	G-box
LcbHLH87	896	887	G-box
LcbHLH87	898	892	G-box
LcbHLH87	103	94	I-box
LcbHLH37	263	269	LTR
LcbHLH37	1285	1291	ARE
LcbHLH37	861	855	MYB recognition site
LcbHLH37	1427	1421	MYB recognition site
LcbHLH37	373	367	MYB
LcbHLH37	413	418	ABRE
LcbHLH37	496	502	ABRE
LcbHLH37	497	502	ABRE
LcbHLH37	658	653	ABRE
LcbHLH37	848	843	ABRE
LcbHLH37	373	367	Myb-binding site
LcbHLH37	861	867	CCAAT-box
LcbHLH37	1427	1433	CCAAT-box
LcbHLH37	330	324	MYB
LcbHLH37	781	787	MYB
LcbHLH37	892	898	MYB
LcbHLH37	412	406	G-box
LcbHLH37	496	502	G-box
LcbHLH37	658	664	G-box
LcbHLH37	848	854	G-box
LcbHLH37	496	502	G-box
LcbHLH37	986	980	G-box
LcbHLH37	781	787	MBS
LcbHLH37	892	898	MBS
LcbHLH18	844	838	MYB
LcbHLH18	1452	1446	MYB
LcbHLH18	1225	1219	MYB
LcbHLH18	275	269	CCAAT-box
LcbHLH18	409	415	CCAAT-box
LcbHLH18	1269	1275	CCAAT-box
LcbHLH18	797	803	ABRE
LcbHLH18	797	791	ABRE
LcbHLH18	798	803	ABRE
LcbHLH18	934	928	MYB
LcbHLH18	1225	1219	MYB
LcbHLH18	275	281	MYB recognition site
LcbHLH18	409	403	MYB recognition site
LcbHLH18	1269	1263	MYB recognition site
LcbHLH18	1392	1383	TCA-element
LcbHLH18	812	806	ARE
LcbHLH18	1336	1330	ARE
LcbHLH18	797	803	G-box
LcbHLH39	503	494	ABRE
LcbHLH39	505	500	ABRE
LcbHLH39	297	303	LTR
LcbHLH39	481	487	LTR
LcbHLH39	280	286	ARE
LcbHLH39	286	292	ARE
LcbHLH39	354	360	ARE
LcbHLH39	55	61	MYB
LcbHLH39	443	449	MYB
LcbHLH39	868	862	MYB recognition site
LcbHLH39	469	476	DRE1
LcbHLH39	443	449	Myb-binding site
LcbHLH39	868	874	CCAAT-box
LcbHLH39	1316	1322	G-box
LcbHLH39	131	141	G-box
LcbHLH39	505	511	G-box
LcbHLH7	203	209	MYB
LcbHLH7	1280	1274	MYB
LcbHLH7	107	101	Myb-binding site
LcbHLH7	541	547	Myb-binding site
LcbHLH7	120	114	ABRE
LcbHLH7	407	401	ABRE
LcbHLH7	120	126	ABRE
LcbHLH7	407	413	ABRE
LcbHLH7	285	276	TCA-element
LcbHLH7	107	101	MYB
LcbHLH7	203	209	MYB
LcbHLH7	541	547	MYB
LcbHLH7	1280	1274	MYB
LcbHLH7	232	238	LTR
LcbHLH7	1198	1204	ARE
LcbHLH7	527	521	MYB
LcbHLH7	120	115	ABRE
LcbHLH7	392	397	ABRE
LcbHLH7	407	402	ABRE
LcbHLH7	437	428	ABRE
LcbHLH7	439	445	ABRE
LcbHLH7	440	445	ABRE
LcbHLH7	453	459	ABRE
LcbHLH7	454	459	ABRE
LcbHLH7	584	593	ABRE
LcbHLH7	586	592	ABRE
LcbHLH7	587	592	ABRE
LcbHLH7	650	645	ABRE
LcbHLH7	766	761	ABRE
LcbHLH7	790	785	ABRE
LcbHLH7	852	846	ABRE
LcbHLH7	853	858	ABRE
LcbHLH7	1052	1061	ABRE
LcbHLH7	1054	1048	ABRE
LcbHLH7	1055	1060	ABRE
LcbHLH7	851	843	ABRE
LcbHLH7	512	518	DRE core
LcbHLH7	120	114	G-box
LcbHLH7	407	401	G-box
LcbHLH7	437	446	G-box
LcbHLH7	439	445	G-box
LcbHLH7	453	459	G-box
LcbHLH7	586	592	G-box
LcbHLH7	650	656	G-box
LcbHLH7	653	647	G-box
LcbHLH7	766	772	G-box
LcbHLH7	790	782	G-box
LcbHLH7	850	841	G-box
LcbHLH7	852	846	G-box
LcbHLH7	1052	1043	G-box
LcbHLH7	1053	1062	G-box
LcbHLH7	1054	1048	G-box
LcbHLH7	391	385	G-box
LcbHLH7	439	445	G-box
LcbHLH7	453	459	G-box
LcbHLH7	586	592	G-box
LcbHLH7	790	796	G-box
LcbHLH7	852	846	G-box
LcbHLH7	1054	1048	G-box
LcbHLH7	527	521	MBS
LcbHLH73	998	992	Myb-binding site
LcbHLH73	345	351	MYB
LcbHLH73	848	842	MYB
LcbHLH73	995	1001	MYB
LcbHLH73	345	351	MYB
LcbHLH73	998	992	MYB
LcbHLH73	542	536	DRE core
LcbHLH73	654	648	ABRE
LcbHLH73	148	153	ABRE
LcbHLH73	154	163	ABRE
LcbHLH73	157	162	ABRE
LcbHLH73	655	660	ABRE
LcbHLH73	654	660	ABRE
LcbHLH73	995	1001	MBS
LcbHLH73	1001	1011	I-box
LcbHLH73	147	141	G-box
LcbHLH73	156	150	G-box
LcbHLH73	654	660	G-box
LcbHLH75	269	275	ARE
LcbHLH75	1158	1164	ARE
LcbHLH75	1404	1410	ARE
LcbHLH75	220	226	MYB
LcbHLH75	772	778	MYB
LcbHLH75	1065	1059	MYB
LcbHLH75	1153	1159	MYB
LcbHLH75	985	976	ABRE
LcbHLH75	1025	1018	ABRE
LcbHLH75	772	778	Myb-binding site
LcbHLH75	220	226	MYB
LcbHLH75	1065	1059	MYB
LcbHLH75	1153	1159	MYB
LcbHLH75	1480	1486	G-box
LcbHLH41	588	593	ABRE
LcbHLH41	954	949	ABRE
LcbHLH41	1043	1038	ABRE
LcbHLH41	1302	1293	ABRE
LcbHLH41	587	581	ABRE
LcbHLH41	954	960	ABRE
LcbHLH41	587	593	ABRE
LcbHLH41	954	948	ABRE
LcbHLH41	383	377	LTR
LcbHLH41	220	214	DRE core
LcbHLH41	1263	1257	MYB
LcbHLH41	1481	1487	MYB
LcbHLH41	130	124	MYB
LcbHLH41	579	585	MYB
LcbHLH41	1263	1257	MYB
LcbHLH41	587	593	G-box
LcbHLH41	954	948	G-box
LcbHLH41	1043	1049	G-box
LcbHLH48	444	450	ABRE
LcbHLH48	445	450	ABRE
LcbHLH48	555	561	ABRE
LcbHLH48	556	561	ABRE
LcbHLH48	687	692	ABRE
LcbHLH48	686	680	ABRE
LcbHLH48	686	692	ABRE
LcbHLH48	1191	1197	ARE
LcbHLH48	215	221	MYB recognition site
LcbHLH48	417	411	MYB recognition site
LcbHLH48	177	171	MYB
LcbHLH48	671	665	MYB
LcbHLH48	742	736	MYB
LcbHLH48	1150	1156	MYB
LcbHLH48	1365	1371	MYB
LcbHLH48	627	633	MYB
LcbHLH48	742	736	Myb-binding site
LcbHLH48	1365	1371	Myb-binding site
LcbHLH48	431	438	DRE1
LcbHLH48	215	209	CCAAT-box
LcbHLH48	417	423	CCAAT-box
LcbHLH48	177	171	MYB
LcbHLH48	1150	1156	MYB
LcbHLH48	443	451	G-box
LcbHLH48	444	450	G-box
LcbHLH48	555	561	G-box
LcbHLH48	686	692	G-box
LcbHLH48	444	450	G-box
LcbHLH48	555	561	G-box
LcbHLH48	916	906	I-box
LcbHLH48	627	633	MBS
LcbHLH68	1159	1150	ABRE
LcbHLH68	401	392	TCA-element
LcbHLH68	376	385	TCA-element
LcbHLH68	1344	1338	MYB recognition site
LcbHLH68	94	88	MYB
LcbHLH68	836	830	MYB
LcbHLH68	461	467	MYB
LcbHLH68	833	839	MYB
LcbHLH68	1344	1350	CCAAT-box
LcbHLH68	94	88	Myb-binding site
LcbHLH68	836	830	Myb-binding site
LcbHLH68	1230	1240	I-box
LcbHLH68	461	467	MBS
LcbHLH67	210	216	MYB
LcbHLH67	346	340	MYB
LcbHLH67	1268	1259	TCA-element
LcbHLH67	139	133	MYB recognition site
LcbHLH67	544	550	MYB recognition site
LcbHLH67	1109	1103	MYB recognition site
LcbHLH67	799	793	ARE
LcbHLH67	115	106	ABRE
LcbHLH67	117	112	ABRE
LcbHLH67	1233	1228	ABRE
LcbHLH67	139	145	CCAAT-box
LcbHLH67	544	538	CCAAT-box
LcbHLH67	1109	1115	CCAAT-box
LcbHLH67	346	340	Myb-binding site
LcbHLH67	343	349	MYB
LcbHLH67	117	123	G-box
LcbHLH67	1233	1239	G-box
LcbHLH67	343	349	MBS
LcbHLH66	108	114	CCAAT-box
LcbHLH66	337	331	CCAAT-box
LcbHLH66	693	699	MYB
LcbHLH66	1464	1470	MYB
LcbHLH66	1231	1222	TCA-element
LcbHLH66	108	102	MYB recognition site
LcbHLH66	337	343	MYB recognition site
LcbHLH66	693	699	MYB
LcbHLH66	606	600	LTR
LcbHLH66	1146	1140	ARE
LcbHLH66	1288	1294	ABRE
LcbHLH66	1289	1294	ABRE
LcbHLH66	1344	1339	ABRE
LcbHLH66	1288	1282	ABRE
LcbHLH66	585	593	I-box
LcbHLH66	1344	1350	G-box
LcbHLH66	1288	1294	G-box
LcbHLH65	571	565	Myb-binding site
LcbHLH65	345	351	MYB
LcbHLH65	1467	1461	MYB
LcbHLH65	336	330	LTR
LcbHLH65	252	258	ARE
LcbHLH65	571	565	MYB
LcbHLH65	882	888	MYB
LcbHLH65	355	362	ABRE
LcbHLH65	484	489	ABRE
LcbHLH65	538	543	ABRE
LcbHLH65	748	753	ABRE
LcbHLH65	483	477	ABRE
LcbHLH65	674	665	TCA-element
LcbHLH65	483	489	ABRE
LcbHLH65	1467	1461	MBS
LcbHLH65	79	87	I-box
LcbHLH65	1243	1234	I-box
LcbHLH65	483	489	G-box
LcbHLH65	537	531	G-box
LcbHLH65	747	741	G-box
LcbHLH36	1124	1119	ABRE
LcbHLH36	1124	1130	ABRE
LcbHLH36	1124	1118	ABRE
LcbHLH36	795	801	LTR
LcbHLH36	118	112	MYB
LcbHLH36	215	221	MYB
LcbHLH36	1003	1009	DRE core
LcbHLH36	215	221	MYB
LcbHLH36	1124	1118	G-box
LcbHLH35	2	8	MYB
LcbHLH35	204	198	MYB
LcbHLH35	200	194	CCAAT-box
LcbHLH35	921	927	CCAAT-box
LcbHLH35	1457	1463	Myb-binding site
LcbHLH35	1131	1125	ABRE
LcbHLH35	10	5	ABRE
LcbHLH35	412	421	ABRE
LcbHLH35	414	420	ABRE
LcbHLH35	415	420	ABRE
LcbHLH35	1131	1126	ABRE
LcbHLH35	1131	1137	ABRE
LcbHLH35	129	119	AT-rich
LcbHLH35	204	198	MYB
LcbHLH35	1457	1463	MYB
LcbHLH35	297	291	DRE core
LcbHLH35	200	206	MYB recognition site
LcbHLH35	921	915	MYB recognition site
LcbHLH35	343	352	TCA-element
LcbHLH35	288	282	LTR
LcbHLH35	360	354	LTR
LcbHLH35	340	346	ARE
LcbHLH35	649	643	ARE
LcbHLH35	412	421	G-box
LcbHLH35	414	420	G-box
LcbHLH35	1131	1125	G-box
LcbHLH35	10	16	G-box
LcbHLH35	414	420	G-box
LcbHLH45	478	484	MYB recognition site
LcbHLH45	69	75	MYB
LcbHLH45	338	344	MYB
LcbHLH45	760	754	MYB
LcbHLH45	819	813	MYB
LcbHLH45	69	75	Myb-binding site
LcbHLH45	760	754	Myb-binding site
LcbHLH45	819	813	Myb-binding site
LcbHLH45	478	472	CCAAT-box
LcbHLH45	338	344	MYB
LcbHLH45	371	365	MYB
LcbHLH45	1251	1245	MYB
LcbHLH45	1394	1388	MYB
LcbHLH45	1251	1245	MBS
LcbHLH45	1394	1388	MBS
LcbHLH45	907	898	I-box
LcbHLH46	494	488	DRE core
LcbHLH46	8	2	MYB
LcbHLH46	89	83	MYB
LcbHLH46	154	148	MYB
LcbHLH46	1372	1366	MYB
LcbHLH46	999	993	ARE
LcbHLH46	8	2	Myb-binding site
LcbHLH46	89	83	Myb-binding site
LcbHLH46	154	148	Myb-binding site
LcbHLH46	1372	1366	Myb-binding site
LcbHLH46	1049	1055	MYB
LcbHLH46	1099	1105	MYB
LcbHLH46	1135	1141	MYB
LcbHLH46	1171	1177	MYB
LcbHLH46	1207	1213	MYB
LcbHLH46	112	107	ABRE
LcbHLH46	922	917	ABRE
LcbHLH46	112	118	G-box
LcbHLH46	509	499	G-box
LcbHLH46	922	928	G-box
LcbHLH5	1296	1290	ARE
LcbHLH5	1092	1086	LTR
LcbHLH5	1164	1170	LTR
LcbHLH5	320	314	MYB
LcbHLH5	440	446	MYB
LcbHLH5	252	246	MYB recognition site
LcbHLH5	941	935	MYB recognition site
LcbHLH5	440	446	Myb-binding site
LcbHLH5	320	314	MYB
LcbHLH5	252	258	CCAAT-box
LcbHLH5	941	947	CCAAT-box
LcbHLH5	646	651	ABRE
LcbHLH5	1384	1377	DRE1
LcbHLH5	580	586	MYB
LcbHLH5	645	639	G-box
LcbHLH5	580	586	MBS
LcbHLH5	310	320	I-box
LcbHLH6	858	864	ARE
LcbHLH6	1450	1456	ARE
LcbHLH6	1136	1130	MYB
LcbHLH6	1249	1255	MYB
LcbHLH6	795	801	MYB recognition site
LcbHLH6	8	18	AT-rich
LcbHLH6	1136	1130	MYB
LcbHLH6	1249	1255	MYB
LcbHLH6	795	789	CCAAT-box
LcbHLH6	279	273	MYB
LcbHLH6	279	273	MBS
LcbHLH86	355	363	ABRE
LcbHLH86	117	126	ABRE
LcbHLH86	120	125	ABRE
LcbHLH86	128	134	ABRE
LcbHLH86	129	134	ABRE
LcbHLH86	223	229	ABRE
LcbHLH86	224	229	ABRE
LcbHLH86	348	353	ABRE
LcbHLH86	356	362	ABRE
LcbHLH86	357	362	ABRE
LcbHLH86	754	745	ABRE
LcbHLH86	756	750	ABRE
LcbHLH86	757	762	ABRE
LcbHLH86	347	341	ABRE
LcbHLH86	347	353	ABRE
LcbHLH86	376	382	ARE
LcbHLH86	619	625	MYB
LcbHLH86	637	643	MYB
LcbHLH86	877	883	MYB
LcbHLH86	623	617	MYB recognition site
LcbHLH86	934	940	MYB recognition site
LcbHLH86	1113	1107	MYB recognition site
LcbHLH86	1193	1199	MYB recognition site
LcbHLH86	1263	1257	MYB recognition site
LcbHLH86	1447	1453	MYB recognition site
LcbHLH86	742	736	MYB
LcbHLH86	1288	1282	MYB
LcbHLH86	619	625	MYB
LcbHLH86	877	883	MYB
LcbHLH86	623	629	CCAAT-box
LcbHLH86	934	928	CCAAT-box
LcbHLH86	1113	1119	CCAAT-box
LcbHLH86	1193	1187	CCAAT-box
LcbHLH86	1263	1269	CCAAT-box
LcbHLH86	1447	1441	CCAAT-box
LcbHLH86	127	135	G-box
LcbHLH86	128	134	G-box
LcbHLH86	222	230	G-box
LcbHLH86	223	229	G-box
LcbHLH86	347	353	G-box
LcbHLH86	354	363	G-box
LcbHLH86	356	362	G-box
LcbHLH86	754	763	G-box
LcbHLH86	756	750	G-box
LcbHLH86	119	113	G-box
LcbHLH86	128	134	G-box
LcbHLH86	223	229	G-box
LcbHLH86	356	362	G-box
LcbHLH86	756	750	G-box
LcbHLH86	1106	1097	I-box
LcbHLH77	299	305	MYB
LcbHLH77	405	399	MYB
LcbHLH77	275	269	Myb-binding site
LcbHLH77	1100	1094	ABRE
LcbHLH77	1177	1183	ABRE
LcbHLH77	1100	1106	ABRE
LcbHLH77	1177	1171	ABRE
LcbHLH77	44	37	ABRE
LcbHLH77	994	988	ABRE
LcbHLH77	995	1000	ABRE
LcbHLH77	1072	1066	ABRE
LcbHLH77	1073	1078	ABRE
LcbHLH77	1100	1095	ABRE
LcbHLH77	1175	1185	ABRE
LcbHLH77	1178	1183	ABRE
LcbHLH77	275	269	MYB
LcbHLH77	405	399	MYB
LcbHLH77	389	395	LTR
LcbHLH77	816	810	ARE
LcbHLH77	867	861	ARE
LcbHLH77	872	866	ARE
LcbHLH77	916	922	ARE
LcbHLH77	945	939	ARE
LcbHLH77	299	305	MBS
LcbHLH77	994	988	G-box
LcbHLH77	1071	1063	G-box
LcbHLH77	1072	1066	G-box
LcbHLH77	1100	1094	G-box
LcbHLH77	1177	1183	G-box
LcbHLH77	994	988	G-box
LcbHLH77	1072	1066	G-box
LcbHLH38	1317	1323	MYB
LcbHLH38	1056	1050	CCAAT-box
LcbHLH38	186	180	Myb-binding site
LcbHLH38	640	646	Myb-binding site
LcbHLH38	719	713	Myb-binding site
LcbHLH38	517	511	MYB
LcbHLH38	856	850	MYB
LcbHLH38	1442	1448	MYB
LcbHLH38	966	974	ABRE
LcbHLH38	186	180	MYB
LcbHLH38	640	646	MYB
LcbHLH38	719	713	MYB
LcbHLH38	1317	1323	MYB
LcbHLH38	1056	1062	MYB recognition site
LcbHLH38	1451	1457	ARE
LcbHLH38	966	972	ABRE
LcbHLH38	966	960	ABRE
LcbHLH38	371	364	ABRE
LcbHLH38	966	974	ABRE
LcbHLH38	967	972	ABRE
LcbHLH38	1262	1267	ABRE
LcbHLH38	1349	1344	ABRE
LcbHLH38	517	511	MBS
LcbHLH38	1442	1448	MBS
LcbHLH38	88	97	I-box
LcbHLH38	632	622	I-box
LcbHLH38	1261	1255	G-box
LcbHLH38	1349	1355	G-box
LcbHLH38	966	972	G-box
LcbHLH76	2	8	ABRE
LcbHLH76	3	8	ABRE
LcbHLH76	19	25	ABRE
LcbHLH76	20	25	ABRE
LcbHLH76	283	289	ABRE
LcbHLH76	284	289	ABRE
LcbHLH76	301	307	ABRE
LcbHLH76	302	307	ABRE
LcbHLH76	1428	1419	ABRE
LcbHLH76	1430	1424	ABRE
LcbHLH76	1431	1436	ABRE
LcbHLH76	1065	1071	MYB
LcbHLH76	1093	1099	MYB recognition site
LcbHLH76	1377	1383	MYB recognition site
LcbHLH76	248	242	ARE
LcbHLH76	320	326	LTR
LcbHLH76	1183	1177	LTR
LcbHLH76	552	546	MYB
LcbHLH76	1093	1087	CCAAT-box
LcbHLH76	1377	1371	CCAAT-box
LcbHLH76	1065	1071	Myb-binding site
LcbHLH76	2	8	G-box
LcbHLH76	18	26	G-box
LcbHLH76	19	25	G-box
LcbHLH76	283	289	G-box
LcbHLH76	301	307	G-box
LcbHLH76	1428	1419	G-box
LcbHLH76	1430	1424	G-box
LcbHLH76	2	8	G-box
LcbHLH76	19	25	G-box
LcbHLH76	283	289	G-box
LcbHLH76	301	307	G-box
LcbHLH76	1430	1424	G-box
LcbHLH14	350	356	MYB
LcbHLH14	460	466	MYB
LcbHLH14	877	871	MYB
LcbHLH14	323	329	CCAAT-box
LcbHLH14	977	983	CCAAT-box
LcbHLH14	548	554	ABRE
LcbHLH14	481	490	ABRE
LcbHLH14	483	489	ABRE
LcbHLH14	484	489	ABRE
LcbHLH14	548	543	ABRE
LcbHLH14	548	542	ABRE
LcbHLH14	877	871	MYB
LcbHLH14	323	317	MYB recognition site
LcbHLH14	977	971	MYB recognition site
LcbHLH14	478	467.5	G-box
LcbHLH14	481	472	G-box
LcbHLH14	483	489	G-box
LcbHLH14	548	542	G-box
LcbHLH14	483	489	G-box
LcbHLH15	1177	1183	CCAAT-box
LcbHLH15	969	975	MYB
LcbHLH15	1037	1043	MYB
LcbHLH15	1177	1171	MYB recognition site
LcbHLH15	969	975	MYB
LcbHLH15	1194	1188	MYB
LcbHLH15	90	96	ARE
LcbHLH15	1164	1170	ARE
LcbHLH15	1120	1114	ABRE
LcbHLH15	1120	1126	ABRE
LcbHLH15	1276	1286	AT-rich
LcbHLH15	41	32	ABRE
LcbHLH15	184	190	ABRE
LcbHLH15	185	190	ABRE
LcbHLH15	1120	1115	ABRE
LcbHLH15	1037	1043	MBS
LcbHLH15	184	190	G-box
LcbHLH15	184	190	G-box
LcbHLH15	1120	1114	G-box
LcbHLH15	1221	1215	G-box
LcbHLH15	1308	1302	G-box
LcbHLH34	420	426	MYB
LcbHLH34	1093	1099	MYB
LcbHLH34	1264	1258	DRE core
LcbHLH34	81	87	MYB recognition site
LcbHLH34	322	329	ABRE
LcbHLH34	1239	1234	ABRE
LcbHLH34	420	426	MYB
LcbHLH34	1093	1099	MYB
LcbHLH34	81	75	CCAAT-box
LcbHLH34	601	595	MYB
LcbHLH34	1360	1366	MYB
LcbHLH34	1239	1245	G-box
LcbHLH34	495	489	G-box
LcbHLH29	1247	1253	MYB
LcbHLH29	508	514	Myb-binding site
LcbHLH29	52	58	MYB
LcbHLH29	402	408	MYB
LcbHLH29	875	881	ARE
LcbHLH29	927	921	ARE
LcbHLH29	1027	1036	TCA-element
LcbHLH29	52	58	MYB
LcbHLH29	402	408	MYB
LcbHLH29	508	514	MYB
LcbHLH29	742	733	I-box
LcbHLH30	413	407	ABRE
LcbHLH30	1198	1204	ABRE
LcbHLH30	413	408	ABRE
LcbHLH30	1199	1204	ABRE
LcbHLH30	413	419	ABRE
LcbHLH30	1198	1192	ABRE
LcbHLH30	574	568	MYB recognition site
LcbHLH30	1217	1223	MYB recognition site
LcbHLH30	1270	1279	TCA-element
LcbHLH30	136	130	LTR
LcbHLH30	406	412	LTR
LcbHLH30	1385	1391	LTR
LcbHLH30	1426	1432	LTR
LcbHLH30	1467	1473	LTR
LcbHLH30	316	310	ARE
LcbHLH30	409	415	ARE
LcbHLH30	861	867	MYB
LcbHLH30	574	580	CCAAT-box
LcbHLH30	1217	1211	CCAAT-box
LcbHLH30	225	218	DRE1
LcbHLH30	413	407	G-box
LcbHLH30	1198	1204	G-box
LcbHLH30	861	867	MBS
LcbHLH31	21	14	ABRE
LcbHLH31	337	346	ABRE
LcbHLH31	339	345	ABRE
LcbHLH31	340	345	ABRE
LcbHLH31	523	514	ABRE
LcbHLH31	525	531	ABRE
LcbHLH31	526	531	ABRE
LcbHLH31	911	905	ABRE
LcbHLH31	912	917	ABRE
LcbHLH31	638	629	TCA-element
LcbHLH31	42	36	MYB
LcbHLH31	109	115	MYB
LcbHLH31	273	267	MYB
LcbHLH31	1153	1159	MYB
LcbHLH31	38	44	MYB
LcbHLH31	1010	1016	MYB
LcbHLH31	109	115	Myb-binding site
LcbHLH31	1153	1159	Myb-binding site
LcbHLH31	516	523	DRE1
LcbHLH31	273	267	MYB
LcbHLH31	339	345	G-box
LcbHLH31	524	532	G-box
LcbHLH31	525	531	G-box
LcbHLH31	911	905	G-box
LcbHLH31	339	345	G-box
LcbHLH31	525	531	G-box
LcbHLH31	911	905	G-box
LcbHLH31	38	44	MBS
LcbHLH31	1010	1016	MBS
LcbHLH28	1462	1452	AT-rich
LcbHLH28	684	677	ABRE
LcbHLH28	176	170	ARE
LcbHLH28	916	910	ARE
LcbHLH28	260	266	MYB
LcbHLH28	1002	996	MYB
LcbHLH28	1156	1150	DRE core
LcbHLH28	516	525	TCA-element
LcbHLH28	949	940	TCA-element
LcbHLH28	162	168	MYB
LcbHLH28	314	320	MYB
LcbHLH28	1040	1034	MYB
LcbHLH28	1002	996	MYB
LcbHLH28	775	784	I-box
LcbHLH28	314	320	MBS
LcbHLH27	914	920	MYB
LcbHLH27	984	978	MYB
LcbHLH27	1038	1029	TCA-element
LcbHLH27	1376	1382	MYB
LcbHLH27	914	920	Myb-binding site
LcbHLH27	984	978	Myb-binding site
LcbHLH27	771	781	I-box
LcbHLH27	1376	1382	MBS
LcbHLH26	1024	1018	MYB
LcbHLH26	267	273	ABRE
LcbHLH26	267	262	ABRE
LcbHLH26	297	302	ABRE
LcbHLH26	267	261	ABRE
LcbHLH26	123	129	LTR
LcbHLH26	998	1004	MYB
LcbHLH26	1024	1018	MYB
LcbHLH26	535	526	TCA-element
LcbHLH26	267	261	G-box
LcbHLH26	296	290	G-box
LcbHLH25	3	-3	MYB
LcbHLH25	16	10	MYB
LcbHLH25	448	442	MYB
LcbHLH25	696	702	MYB
LcbHLH25	574	565	TCA-element
LcbHLH25	1310	1301	TCA-element
LcbHLH25	506	511	ABRE
LcbHLH25	588	594	ABRE
LcbHLH25	589	594	ABRE
LcbHLH25	745	750	ABRE
LcbHLH25	768	762	ABRE
LcbHLH25	769	774	ABRE
LcbHLH25	16	10	MYB
LcbHLH25	448	442	MYB
LcbHLH25	388	394	MYB
LcbHLH25	505	499	G-box
LcbHLH25	588	594	G-box
LcbHLH25	768	762	G-box
LcbHLH25	588	594	G-box
LcbHLH25	710	716	G-box
LcbHLH25	744	738	G-box
LcbHLH25	768	762	G-box
LcbHLH25	388	394	MBS
LcbHLH25	1412	1422	I-box
LcbHLH25	1413	1421	I-box
LcbHLH11	316	322	ARE
LcbHLH11	977	971	ARE
LcbHLH11	149	143	LTR
LcbHLH11	263	269	MYB
LcbHLH11	592	586	MYB
LcbHLH11	1031	1025	MYB
LcbHLH11	896	886	AT-rich
LcbHLH11	1027	1021	ABRE
LcbHLH11	1028	1033	ABRE
LcbHLH11	1189	1184	ABRE
LcbHLH11	263	269	Myb-binding site
LcbHLH11	564	558	MYB
LcbHLH11	1027	1021	G-box
LcbHLH11	1027	1021	G-box
LcbHLH11	1189	1195	G-box
LcbHLH11	188	197	I-box
LcbHLH59	9	15	ARE
LcbHLH59	549	555	ARE
LcbHLH59	132	126	LTR
LcbHLH59	388	394	MYB
LcbHLH59	953	947	MYB
LcbHLH59	1221	1227	MYB
LcbHLH59	1271	1277	MYB
LcbHLH59	1301	1295	MYB
LcbHLH59	1426	1417	TCA-element
LcbHLH59	625	631	ABRE
LcbHLH59	626	631	ABRE
LcbHLH59	977	968	ABRE
LcbHLH59	979	973	ABRE
LcbHLH59	980	985	ABRE
LcbHLH59	1351	1356	ABRE
LcbHLH59	388	394	Myb-binding site
LcbHLH59	1221	1227	MYB
LcbHLH59	1271	1277	MYB
LcbHLH59	1301	1295	MYB
LcbHLH59	431	425	MYB
LcbHLH59	625	631	G-box
LcbHLH59	979	973	G-box
LcbHLH59	1350	1344	G-box
LcbHLH59	625	631	G-box
LcbHLH59	976	966	G-box
LcbHLH59	977	968	G-box
LcbHLH59	979	973	G-box
LcbHLH59	431	425	MBS
LcbHLH60	168	162	ARE
LcbHLH60	1293	1299	ARE
LcbHLH60	1330	1336	ARE
LcbHLH60	1391	1397	ARE
LcbHLH60	1232	1238	MYB
LcbHLH60	876	870	MYB recognition site
LcbHLH60	1232	1238	MYB
LcbHLH60	876	882	CCAAT-box
LcbHLH60	640	646	MYB
LcbHLH60	640	646	MBS
LcbHLH60	49	58	I-box
LcbHLH60	376	384	I-box
LcbHLH61	24	30	CCAAT-box
LcbHLH61	1296	1302	Myb-binding site
LcbHLH61	1344	1350	Myb-binding site
LcbHLH61	1444	1450	Myb-binding site
LcbHLH61	1479	1485	Myb-binding site
LcbHLH61	444	435	TCA-element
LcbHLH61	24	18	MYB recognition site
LcbHLH61	1296	1302	MYB
LcbHLH61	1335	1341	MYB
LcbHLH61	1344	1350	MYB
LcbHLH61	1444	1450	MYB
LcbHLH61	1479	1485	MYB
LcbHLH61	898	904	ARE
LcbHLH61	17	8	I-box
LcbHLH61	233	224	I-box
LcbHLH61	235	244	I-box
LcbHLH61	272	263	I-box
LcbHLH2	860	866	MYB
LcbHLH2	728	722	CCAAT-box
LcbHLH2	389	383	MYB
LcbHLH2	1174	1180	ABRE
LcbHLH2	881	875	ABRE
LcbHLH2	882	887	ABRE
LcbHLH2	1118	1112	ABRE
LcbHLH2	1119	1124	ABRE
LcbHLH2	1172	1181	ABRE
LcbHLH2	1175	1180	ABRE
LcbHLH2	1215	1209	ABRE
LcbHLH2	1216	1221	ABRE
LcbHLH2	1388	1393	ABRE
LcbHLH2	1415	1420	ABRE
LcbHLH2	1423	1418	ABRE
LcbHLH2	1431	1426	ABRE
LcbHLH2	1174	1168	ABRE
LcbHLH2	728	734	MYB recognition site
LcbHLH2	625	634	TCA-element
LcbHLH2	956	947	TCA-element
LcbHLH2	389	383	MYB
LcbHLH2	263	269	DRE core
LcbHLH2	407	397	I-box
LcbHLH2	438	428	I-box
LcbHLH2	508	518	I-box
LcbHLH2	702	711	I-box
LcbHLH2	860	866	MBS
LcbHLH2	881	875	G-box
LcbHLH2	1118	1112	G-box
LcbHLH2	1174	1180	G-box
LcbHLH2	1215	1209	G-box
LcbHLH2	1387	1381	G-box
LcbHLH2	881	875	G-box
LcbHLH2	1118	1112	G-box
LcbHLH2	1215	1209	G-box
LcbHLH2	1414	1408	G-box
LcbHLH2	1423	1429	G-box
LcbHLH2	1431	1437	G-box
LcbHLH3	172	166	ARE
LcbHLH3	1194	1188	ARE
LcbHLH3	680	674	ABRE
LcbHLH3	680	675	ABRE
LcbHLH3	752	746	ABRE
LcbHLH3	753	758	ABRE
LcbHLH3	1430	1424	ABRE
LcbHLH3	1431	1436	ABRE
LcbHLH3	1487	1496	ABRE
LcbHLH3	680	686	ABRE
LcbHLH3	1362	1355	DRE1
LcbHLH3	815	821	MYB
LcbHLH3	752	746	G-box
LcbHLH3	1430	1424	G-box
LcbHLH3	680	674	G-box
LcbHLH3	752	746	G-box
LcbHLH3	1430	1424	G-box
LcbHLH3	815	821	MBS
LcbHLH4	243	252	ABRE
LcbHLH4	245	251	ABRE
LcbHLH4	246	251	ABRE
LcbHLH4	1001	1010	ABRE
LcbHLH4	1003	997	ABRE
LcbHLH4	1004	1009	ABRE
LcbHLH4	1089	1084	ABRE
LcbHLH4	1262	1256	ABRE
LcbHLH4	1263	1268	ABRE
LcbHLH4	1089	1095	ABRE
LcbHLH4	1050	1060	AT-rich
LcbHLH4	1089	1083	ABRE
LcbHLH4	800	794	LTR
LcbHLH4	1221	1215	LTR
LcbHLH4	438	432	ARE
LcbHLH4	946	940	ARE
LcbHLH4	982	988	ARE
LcbHLH4	1471	1477	ARE
LcbHLH4	913	907	MYB
LcbHLH4	668	674	MYB recognition site
LcbHLH4	1354	1348	MYB recognition site
LcbHLH4	98	92	MYB
LcbHLH4	668	662	CCAAT-box
LcbHLH4	1354	1360	CCAAT-box
LcbHLH4	243	234	G-box
LcbHLH4	244	253	G-box
LcbHLH4	245	251	G-box
LcbHLH4	465	459	G-box
LcbHLH4	1003	997	G-box
LcbHLH4	1089	1083	G-box
LcbHLH4	1262	1256	G-box
LcbHLH4	245	251	G-box
LcbHLH4	1003	997	G-box
LcbHLH4	1262	1256	G-box
LcbHLH4	98	92	MBS
LcbHLH49	245	251	ABRE
LcbHLH49	246	251	ABRE
LcbHLH49	1237	1232	ABRE
LcbHLH49	1237	1231	ABRE
LcbHLH49	18	24	ARE
LcbHLH49	1082	1073	TCA-element
LcbHLH49	75	69	MYB
LcbHLH49	1123	1129	MYB
LcbHLH49	1152	1146	MYB
LcbHLH49	1352	1358	MYB
LcbHLH49	1388	1394	MYB
LcbHLH49	1432	1438	MYB
LcbHLH49	1438	1432	MYB
LcbHLH49	1123	1129	MYB
LcbHLH49	1152	1146	MYB
LcbHLH49	1352	1358	MYB
LcbHLH49	1388	1394	MYB
LcbHLH49	1432	1438	MYB
LcbHLH49	1438	1432	MYB
LcbHLH49	245	251	G-box
LcbHLH49	1237	1231	G-box
LcbHLH49	245	251	G-box

## Sheet: TableS7
Table S7.Phylogenetic Analysis and Classification of LcbHLH TF Family
Protein ID	Subfamily	Family members
LcbHLH50	A	2
LcbHLH87
LcbHLH14	B	2
LcbHLH15
LcbHLH2	C	2
LcbHLH8
LcbHLH88	D	2
LcbHLH89
LcbHLH27	E	3
LcbHLH11
LcbHLH26
LcbHLH5	F	2
LcbHLH35
LcbHLH1	G	6
LcbHLH20
LcbHLH49
LcbHLH55
LcbHLH73
LcbHLH83
LcbHLH84	H	3
LcbHLH85
LcbHLH72
LcbHLH77	I	5
LcbHLH12
LcbHLH28
LcbHLH33
LcbHLH40
LcbHLH75	J	4
LcbHLH44
LcbHLH39
LcbHLH34
LcbHLH37	K	4
LcbHLH4
LcbHLH6
LcbHLH36
LcbHLH29	L	2
LcbHLH22
LcbHLH91	M	3
LcbHLH74
LcbHLH71
LcbHLH38	N	2
LcbHLH3
LcbHLH63	O	10
LcbHLH62
LcbHLH57
LcbHLH42
LcbHLH19
LcbHLH9
LcbHLH65
LcbHLH67
LcbHLH66
LcbHLH68
LcbHLH70	P	2
LcbHLH80
LcbHLH54	Q	7
LcbHLH52
LcbHLH17
LcbHLH25
LcbHLH46
LcbHLH60
LcbHLH48
LcbHLH76	R	6
LcbHLH86
LcbHLH69
LcbHLH82
LcbHLH24
LcbHLH31
LcbHLH59	S	10
LcbHLH47
LcbHLH13
LcbHLH45
LcbHLH58
LcbHLH32
LcbHLH53
LcbHLH16
LcbHLH79
LcbHLH78
LcbHLH81	Single	14
LcbHLH18
LcbHLH41
LcbHLH51
LcbHLH61
LcbHLH43
LcbHLH56
LcbHLH21
LcbHLH23
LcbHLH30
LcbHLH10
LcbHLH7
LcbHLH90
LcbHLH64

## Sheet: TableS8
Table S8.Detailed information of interaction network of LcbHLHs
Query item	String id	Identity	Bitscore	Preferred name
LcbHLH72	3702.AT4G33880.1	95.2	159.8	RSL2
LcbHLH26	3702.AT5G09750.1	92.2	162.5	HEC3
LcbHLH87	3702.AT4G33880.1	91.8	172.9	RSL2
LcbHLH86	3702.AT4G33880.1	91.8	172.9	RSL2
LcbHLH30	3702.AT5G50915.1	81.9	152.9	AT5G50915
LcbHLH10	3702.AT1G25330.1	79.2	142.5	CES
LcbHLH8	3702.AT1G66470.1	78.6	143.7	RHD6
LcbHLH14	3702.AT1G26945.1	78.3	130.6	KDR
LcbHLH73	3702.AT4G36930.1	77.7	121.3	SPT
LcbHLH64	3702.AT3G19860.2	71.4	63.5	bHLH121
LcbHLH69	3702.AT5G65640.1	68.4	266.9	bHLH093
LcbHLH77	3702.AT2G24260.1	67.7	235.3	LRL1
LcbHLH93	3702.AT1G25330.1	65.2	157.9	CES
LcbHLH40	3702.AT1G68810.1	64.2	268.5	AT1G68810
LcbHLH33	3702.AT2G41130.1	63.9	202.6	AT2G41130
LcbHLH76	3702.AT1G60060.1	62.2	413.7	AT1G60060
LcbHLH11	3702.AT5G67060.1	61.5	180.3	HEC1
LcbHLH13	3702.AT1G22490.1	60.8	237.3	AT1G22490
LcbHLH21	3702.AT2G31730.1	59.6	149.8	AT2G31730
LcbHLH41	3702.AT2G28160.1	58.7	204.5	FRU
LcbHLH44	3702.AT4G02590.1	58.3	303.1	UNE12
LcbHLH78	3702.AT5G57150.4	58.1	225.3	AT5G57150
LcbHLH27	3702.AT3G50330.1	57.4	171.8	HEC2
LcbHLH90	3702.AT5G53900.2	56.9	429.5	AT5G53900
LcbHLH88	3702.AT5G57150.4	56.9	206.8	AT5G57150
LcbHLH32	3702.AT3G24140.1	56.3	330.5	FMA
LcbHLH51	3702.AT4G14410.1	55.2	135.2	bHLH104
LcbHLH34	3702.AT5G58010.1	54.5	169.1	LRL3
LcbHLH7	3702.AT4G34530.1	54.4	173.3	CIB1
LcbHLH15	3702.AT1G26945.1	54.3	90.1	KDR
LcbHLH79	3702.AT1G68810.1	54.2	164.9	AT1G68810
LcbHLH81	3702.AT5G53210.1	54.2	186.8	SPCH
LcbHLH80	3702.AT5G53210.1	54.2	186.8	SPCH
LcbHLH39	3702.AT5G58010.1	54	171.4	LRL3
LcbHLH91	3702.AT2G34820.1	53.3	132.5	AT2G34820
LcbHLH59	3702.AT1G72210.1	53.1	199.5	AT1G72210
LcbHLH92	3702.AT2G34820.1	52.7	132.9	AT2G34820
LcbHLH74	3702.AT1G60060.1	51.9	236.1	AT1G60060
LcbHLH47	3702.AT1G22490.1	51.4	72.4	AT1G22490
LcbHLH48	3702.AT1G32640.1	50.2	485.7	MYC2
LcbHLH49	3702.AT1G09530.2	50	116.7	PIF3
LcbHLH60	3702.AT1G32640.1	49.1	458.4	MYC2
LcbHLH31	3702.AT3G26744.1	49	394.4	ICE1
LcbHLH37	3702.AT1G59640.2	48.8	162.2	BPEp
LcbHLH12	3702.AT1G68810.1	48.5	154.1	AT1G68810
LcbHLH5	3702.AT2G42280.1	48.4	194.9	FBH4
LcbHLH25	3702.AT4G16430.1	48.4	365.9	AT4G16430
LcbHLH24	3702.AT3G26744.1	48.2	370.9	ICE1
LcbHLH35	3702.AT2G42280.1	48.1	218.4	FBH4
LcbHLH53	3702.AT3G06120.1	47.2	136.3	MUTE
LcbHLH54	3702.AT5G41315.1	46.4	512.7	GL3
LcbHLH84	3702.AT5G65640.1	45.7	118.6	bHLH093
LcbHLH17	3702.AT1G01260.1	45.3	464.9	AT1G01260
LcbHLH42	3702.AT5G51780.1	45.2	115.2	AT5G51780
LcbHLH61	3702.AT2G31220.1	44.9	245.4	AT2G31220
LcbHLH6	3702.AT3G57800.1	44.2	228.4	AT3G57800
LcbHLH2	3702.AT3G21330.1	44.1	192.6	AT3G21330
LcbHLH36	3702.AT3G57800.1	43.9	140.6	AT3G57800
LcbHLH19	3702.AT4G20970.1	43.5	114.4	AT4G20970
LcbHLH28	3702.AT1G68810.1	43.4	147.5	AT1G68810
LcbHLH18	3702.AT2G16910.1	42.9	387.1	AMS
LcbHLH71	3702.AT1G10120.1	42.4	186	AT1G10120
LcbHLH70	3702.AT4G37850.1	41.9	193	AT4G37850
LcbHLH23	3702.AT5G50915.1	41.1	126.3	AT5G50915
LcbHLH94	3702.AT1G26260.1	41.1	198.7	CIB5
LcbHLH82	3702.AT4G37850.1	40.9	198.4	AT4G37850
LcbHLH75	3702.AT1G26260.1	40.8	195.7	CIB5
LcbHLH4	3702.AT5G62610.1	40.8	170.6	AT5G62610
LcbHLH9	3702.AT4G20970.1	40.7	112.5	AT4G20970
LcbHLH58	3702.AT3G61950.1	40.3	213.8	AT3G61950
LcbHLH85	3702.AT5G61270.1	40.2	115.2	PIF7
LcbHLH45	3702.AT3G61950.1	40.1	184.9	AT3G61950
LcbHLH52	3702.AT4G09820.1	39.6	369.4	TT8
LcbHLH67	3702.AT4G20970.1	39.5	99.4	AT4G20970
LcbHLH29	3702.AT3G07340.1	38.6	274.2	AT3G07340
LcbHLH57	3702.AT5G51790.1	38.5	97.4	AT5G51790
LcbHLH16	3702.AT5G53210.1	38.3	181	SPCH
LcbHLH50	3702.AT1G06150.1	36.6	332	EMB1444
LcbHLH43	3702.AT5G43650.1	36.5	91.3	BHLH92
LcbHLH22	3702.AT3G07340.1	35.8	222.6	AT3G07340
LcbHLH20	3702.AT2G20180.2	35.8	182.2	PIL5
LcbHLH55	3702.AT1G09530.2	35.1	113.6	PIF3
LcbHLH65	3702.AT4G20970.1	33.8	93.6	AT4G20970
LcbHLH3	3702.AT5G56960.1	33.6	169.5	AT5G56960
LcbHLH46	3702.AT1G32640.1	33.3	272.7	MYC2
LcbHLH66	3702.AT4G20970.1	33.1	101.7	AT4G20970
LcbHLH68	3702.AT4G20970.1	32.8	97.8	AT4G20970
LcbHLH1	3702.AT2G43010.1	32.6	169.1	PIF4
LcbHLH89	3702.AT1G06150.1	32.1	278.9	EMB1444
LcbHLH38	3702.AT5G56960.1	29.5	146	AT5G56960

## Sheet: TableS9
Table S9.Detailed information of interaction network of LcbHLHs with other genes
node1	node1_string_id	node2	node2_string_id	homology	coexpression	experimentally_determined_interaction	database_annotated	automated_textmining	combined_score
AT1G05370	3702.AT1G05370.1	CES	3702.AT1G25330.1	0	0	0	0	0.637	0.637
AT1G25320	3702.AT1G25320.1	CES	3702.AT1G25330.1	0	0	0	0	0.63	0.63
AT4G28240	3702.AT4G28240.1	CES	3702.AT1G25330.1	0	0	0	0	0.637	0.637
AT5G44630	3702.AT5G44630.1	CES	3702.AT1G25330.1	0	0.201	0	0	0.52	0.6
ATCSLC08	3702.AT2G24630.1	CES	3702.AT1G25330.1	0	0	0	0	0.616	0.616
BEE1	3702.AT1G18400.1	CES	3702.AT1G25330.1	0.894	0	0.597	0	0.728	0.627
CES	3702.AT1G25330.1	AT1G05370	3702.AT1G05370.1	0	0	0	0	0.637	0.637
CES	3702.AT1G25330.1	BEE1	3702.AT1G18400.1	0.894	0	0.597	0	0.728	0.627
CES	3702.AT1G25330.1	AT1G25320	3702.AT1G25320.1	0	0	0	0	0.63	0.63
CES	3702.AT1G25330.1	HAC2	3702.AT1G67220.1	0	0	0	0	0.595	0.595
CES	3702.AT1G25330.1	AT5G44630	3702.AT5G44630.1	0	0.201	0	0	0.52	0.6
CES	3702.AT1G25330.1	HAC4	3702.AT1G55970.1	0	0	0	0	0.615	0.615
CES	3702.AT1G25330.1	ATCSLC08	3702.AT2G24630.1	0	0	0	0	0.616	0.616
CES	3702.AT1G25330.1	NTT	3702.AT3G57670.1	0	0	0	0	0.619	0.619
CES	3702.AT1G25330.1	CYP718	3702.AT2G42850.1	0	0	0	0	0.62	0.62
CES	3702.AT1G25330.1	AT4G28240	3702.AT4G28240.1	0	0	0	0	0.637	0.637
CYP718	3702.AT2G42850.1	CES	3702.AT1G25330.1	0	0	0	0	0.62	0.62
HAC2	3702.AT1G67220.1	CES	3702.AT1G25330.1	0	0	0	0	0.595	0.595
HAC4	3702.AT1G55970.1	CES	3702.AT1G25330.1	0	0	0	0	0.615	0.615
NTT	3702.AT3G57670.1	CES	3702.AT1G25330.1	0	0	0	0	0.619	0.619
AT2G40200	3702.AT2G40200.1	RSL2	3702.AT4G33880.1	0	0	0	0	0.619	0.619
AT4G29930	3702.AT4G29930.3	RSL2	3702.AT4G33880.1	0	0.118	0	0	0.617	0.647
AT4G31320	3702.AT4G31320.1	RSL2	3702.AT4G33880.1	0	0.356	0	0	0.506	0.668
AT5G67430	3702.AT5G67430.1	RSL2	3702.AT4G33880.1	0	0.16	0	0	0.592	0.642
COW1	3702.AT4G34580.1	RSL2	3702.AT4G33880.1	0	0.12	0	0	0.637	0.666
EXPA18	3702.AT1G62980.1	RSL2	3702.AT4G33880.1	0	0.426	0	0	0.503	0.703
EXPA7	3702.AT1G12560.1	RSL2	3702.AT4G33880.1	0	0.43	0	0	0.667	0.802
MYB66	3702.AT5G14750.1	RSL2	3702.AT4G33880.1	0	0.128	0	0	0.63	0.663
OBP4	3702.AT5G60850.1	RSL2	3702.AT4G33880.1	0	0	0	0	0.637	0.637
RGE1	3702.AT1G49770.1	RSL2	3702.AT4G33880.1	0	0	0	0	0.679	0.679
RSL2	3702.AT4G33880.1	EXPA7	3702.AT1G12560.1	0	0.43	0	0	0.667	0.802
RSL2	3702.AT4G33880.1	RGE1	3702.AT1G49770.1	0	0	0	0	0.679	0.679
RSL2	3702.AT4G33880.1	EXPA18	3702.AT1G62980.1	0	0.426	0	0	0.503	0.703
RSL2	3702.AT4G33880.1	AT2G40200	3702.AT2G40200.1	0	0	0	0	0.619	0.619
RSL2	3702.AT4G33880.1	AT4G29930	3702.AT4G29930.3	0	0.118	0	0	0.617	0.647
RSL2	3702.AT4G33880.1	AT4G31320	3702.AT4G31320.1	0	0.356	0	0	0.506	0.668
RSL2	3702.AT4G33880.1	OBP4	3702.AT5G60850.1	0	0	0	0	0.637	0.637
RSL2	3702.AT4G33880.1	AT5G67430	3702.AT5G67430.1	0	0.16	0	0	0.592	0.642
RSL2	3702.AT4G33880.1	MYB66	3702.AT5G14750.1	0	0.128	0	0	0.63	0.663
RSL2	3702.AT4G33880.1	COW1	3702.AT4G34580.1	0	0.12	0	0	0.637	0.666
ACI1	3702.AT5G01370.1	HEC3	3702.AT5G09750.1	0	0	0	0	0.7	0.7
AT2G40200	3702.AT2G40200.1	HEC3	3702.AT5G09750.1	0	0	0	0	0.616	0.616
AT4G17800	3702.AT4G17800.1	HEC3	3702.AT5G09750.1	0	0	0	0	0.596	0.596
AT4G29930	3702.AT4G29930.3	HEC3	3702.AT5G09750.1	0	0	0	0	0.616	0.616
CALS5	3702.AT2G13680.1	HEC3	3702.AT5G09750.1	0	0	0	0	0.596	0.596
HEC3	3702.AT5G09750.1	CALS5	3702.AT2G13680.1	0	0	0	0	0.596	0.596
HEC3	3702.AT5G09750.1	AT2G40200	3702.AT2G40200.1	0	0	0	0	0.616	0.616
HEC3	3702.AT5G09750.1	RABA4D	3702.AT3G12160.1	0	0	0	0	0.597	0.597
HEC3	3702.AT5G09750.1	NTT	3702.AT3G57670.1	0	0	0	0	0.616	0.616
HEC3	3702.AT5G09750.1	SHP1	3702.AT3G58780.3	0	0	0	0	0.621	0.621
HEC3	3702.AT5G09750.1	STK	3702.AT4G09960.3	0	0.059	0	0	0.639	0.645
HEC3	3702.AT5G09750.1	AT4G17800	3702.AT4G17800.1	0	0	0	0	0.596	0.596
HEC3	3702.AT5G09750.1	AT4G29930	3702.AT4G29930.3	0	0	0	0	0.616	0.616
HEC3	3702.AT5G09750.1	ACI1	3702.AT5G01370.1	0	0	0	0	0.7	0.7
HEC3	3702.AT5G09750.1	RPL	3702.AT5G02030.1	0	0	0	0	0.619	0.619
NTT	3702.AT3G57670.1	HEC3	3702.AT5G09750.1	0	0	0	0	0.616	0.616
RABA4D	3702.AT3G12160.1	HEC3	3702.AT5G09750.1	0	0	0	0	0.597	0.597
RPL	3702.AT5G02030.1	HEC3	3702.AT5G09750.1	0	0	0	0	0.619	0.619
SHP1	3702.AT3G58780.3	HEC3	3702.AT5G09750.1	0	0	0	0	0.621	0.621
STK	3702.AT4G09960.3	HEC3	3702.AT5G09750.1	0	0.059	0	0	0.639	0.645
EIN3	3702.AT3G20770.1	RHD6	3702.AT1G66470.1	0	0	0	0	0.778	0.778
EXPA18	3702.AT1G62980.1	RHD6	3702.AT1G66470.1	0	0.422	0	0	0.637	0.781
EXPA7	3702.AT1G12560.1	RHD6	3702.AT1G66470.1	0	0.444	0	0	0.806	0.887
GL2	3702.AT1G79840.2	RHD6	3702.AT1G66470.1	0	0	0	0	0.821	0.821
LRX1	3702.AT1G12040.1	RHD6	3702.AT1G66470.1	0	0.44	0	0	0.547	0.735
MYB66	3702.AT5G14750.1	RHD6	3702.AT1G66470.1	0	0.203	0	0	0.77	0.808
PERK13	3702.AT1G70460.1	RHD6	3702.AT1G66470.1	0	0.306	0	0	0.592	0.704
PRP3	3702.AT3G62680.1	RHD6	3702.AT1G66470.1	0	0.433	0	0	0.58	0.751
RHD2	3702.AT5G51060.1	RHD6	3702.AT1G66470.1	0	0.209	0	0	0.723	0.771
RHD6	3702.AT1G66470.1	LRX1	3702.AT1G12040.1	0	0.44	0	0	0.547	0.735
RHD6	3702.AT1G66470.1	EXPA7	3702.AT1G12560.1	0	0.444	0	0	0.806	0.887
RHD6	3702.AT1G66470.1	EXPA18	3702.AT1G62980.1	0	0.422	0	0	0.637	0.781
RHD6	3702.AT1G66470.1	PERK13	3702.AT1G70460.1	0	0.306	0	0	0.592	0.704
RHD6	3702.AT1G66470.1	SHV2	3702.AT5G49270.1	0	0.427	0	0	0.506	0.705
RHD6	3702.AT1G66470.1	PRP3	3702.AT3G62680.1	0	0.433	0	0	0.58	0.751
RHD6	3702.AT1G66470.1	RHD2	3702.AT5G51060.1	0	0.209	0	0	0.723	0.771
RHD6	3702.AT1G66470.1	EIN3	3702.AT3G20770.1	0	0	0	0	0.778	0.778
RHD6	3702.AT1G66470.1	MYB66	3702.AT5G14750.1	0	0.203	0	0	0.77	0.808
SHV2	3702.AT5G49270.1	RHD6	3702.AT1G66470.1	0	0.427	0	0	0.506	0.705
ACI1	3702.AT5G01370.1	SPT	3702.AT4G36930.1	0	0	0	0	0.641	0.641
AT4G30820	3702.AT4G30820.1	SPT	3702.AT4G36930.1	0	0	0	0	0.625	0.625
At4g28560	3702.AT4G28560.1	SPT	3702.AT4G36930.1	0	0	0	0	0.608	0.608
GA3OX1	3702.AT1G15550.1	SPT	3702.AT4G36930.1	0	0	0.499	0	0.253	0.609
GAI	3702.AT1G14920.1	SPT	3702.AT4G36930.1	0	0	0.499	0	0.322	0.645
GLYR2	3702.AT1G17650.1	SPT	3702.AT4G36930.1	0	0	0	0	0.623	0.623
HEC1	3702.AT5G67060.1	SPT	3702.AT4G36930.1	0.614	0.053	0.5	0	0.618	0.62
HEC2	3702.AT3G50330.1	SPT	3702.AT4G36930.1	0.623	0.073	0.5	0	0.565	0.616
IND	3702.AT4G00120.1	SPT	3702.AT4G36930.1	0.648	0	0.758	0	0.698	0.816
SPT	3702.AT4G36930.1	GAI	3702.AT1G14920.1	0	0	0.499	0	0.322	0.645
SPT	3702.AT4G36930.1	GA3OX1	3702.AT1G15550.1	0	0	0.499	0	0.253	0.609
SPT	3702.AT4G36930.1	GLYR2	3702.AT1G17650.1	0	0	0	0	0.623	0.623
SPT	3702.AT4G36930.1	HEC2	3702.AT3G50330.1	0.623	0.073	0.5	0	0.565	0.616
SPT	3702.AT4G36930.1	IND	3702.AT4G00120.1	0.648	0	0.758	0	0.698	0.816
SPT	3702.AT4G36930.1	At4g28560	3702.AT4G28560.1	0	0	0	0	0.608	0.608
SPT	3702.AT4G36930.1	AT4G30820	3702.AT4G30820.1	0	0	0	0	0.625	0.625
SPT	3702.AT4G36930.1	STY2	3702.AT4G36260.1	0	0	0	0	0.616	0.616
SPT	3702.AT4G36930.1	HEC1	3702.AT5G67060.1	0.614	0.053	0.5	0	0.618	0.62
SPT	3702.AT4G36930.1	ACI1	3702.AT5G01370.1	0	0	0	0	0.641	0.641
STY2	3702.AT4G36260.1	SPT	3702.AT4G36930.1	0	0	0	0	0.616	0.616
CBF1	3702.AT4G25490.1	ICE1	3702.AT3G26744.1	0	0	0	0	0.935	0.935
CBF2	3702.AT4G25470.1	ICE1	3702.AT3G26744.1	0	0	0	0	0.919	0.919
HHP1	3702.AT5G20270.1	ICE1	3702.AT3G26744.1	0	0	0.49	0	0.784	0.885
HOS1	3702.AT2G39810.1	ICE1	3702.AT3G26744.1	0	0	0.818	0	0.981	0.996
ICE1	3702.AT3G26744.1	JAZ4	3702.AT1G48500.1	0	0	0.501	0	0.786	0.889
ICE1	3702.AT3G26744.1	RGE1	3702.AT1G49770.1	0	0	0.5	0	0.834	0.913
ICE1	3702.AT3G26744.1	HOS1	3702.AT2G39810.1	0	0	0.818	0	0.981	0.996
ICE1	3702.AT3G26744.1	MUTE	3702.AT3G06120.1	0	0.08	0.5	0	0.932	0.966
ICE1	3702.AT3G26744.1	MYB15	3702.AT3G23250.1	0	0	0.501	0	0.982	0.99
ICE1	3702.AT3G26744.1	HHP1	3702.AT5G20270.1	0	0	0.49	0	0.784	0.885
ICE1	3702.AT3G26744.1	CBF2	3702.AT4G25470.1	0	0	0	0	0.919	0.919
ICE1	3702.AT3G26744.1	CBF1	3702.AT4G25490.1	0	0	0	0	0.935	0.935
ICE1	3702.AT3G26744.1	SIZ1	3702.AT5G60410.2	0	0	0.543	0	0.909	0.956
ICE1	3702.AT3G26744.1	SPCH	3702.AT5G53210.1	0	0.087	0.5	0	0.966	0.983
JAZ4	3702.AT1G48500.1	ICE1	3702.AT3G26744.1	0	0	0.501	0	0.786	0.889
MUTE	3702.AT3G06120.1	ICE1	3702.AT3G26744.1	0	0.08	0.5	0	0.932	0.966
MYB15	3702.AT3G23250.1	ICE1	3702.AT3G26744.1	0	0	0.501	0	0.982	0.99
RGE1	3702.AT1G49770.1	ICE1	3702.AT3G26744.1	0	0	0.5	0	0.834	0.913
SIZ1	3702.AT5G60410.2	ICE1	3702.AT3G26744.1	0	0	0.543	0	0.909	0.956
SPCH	3702.AT5G53210.1	ICE1	3702.AT3G26744.1	0	0.087	0.5	0	0.966	0.983
