# Supplementary material
Source: MDPI journal article supplement (https://www.mdpi.com/1999-4907/13/4/518)

FigureS2.

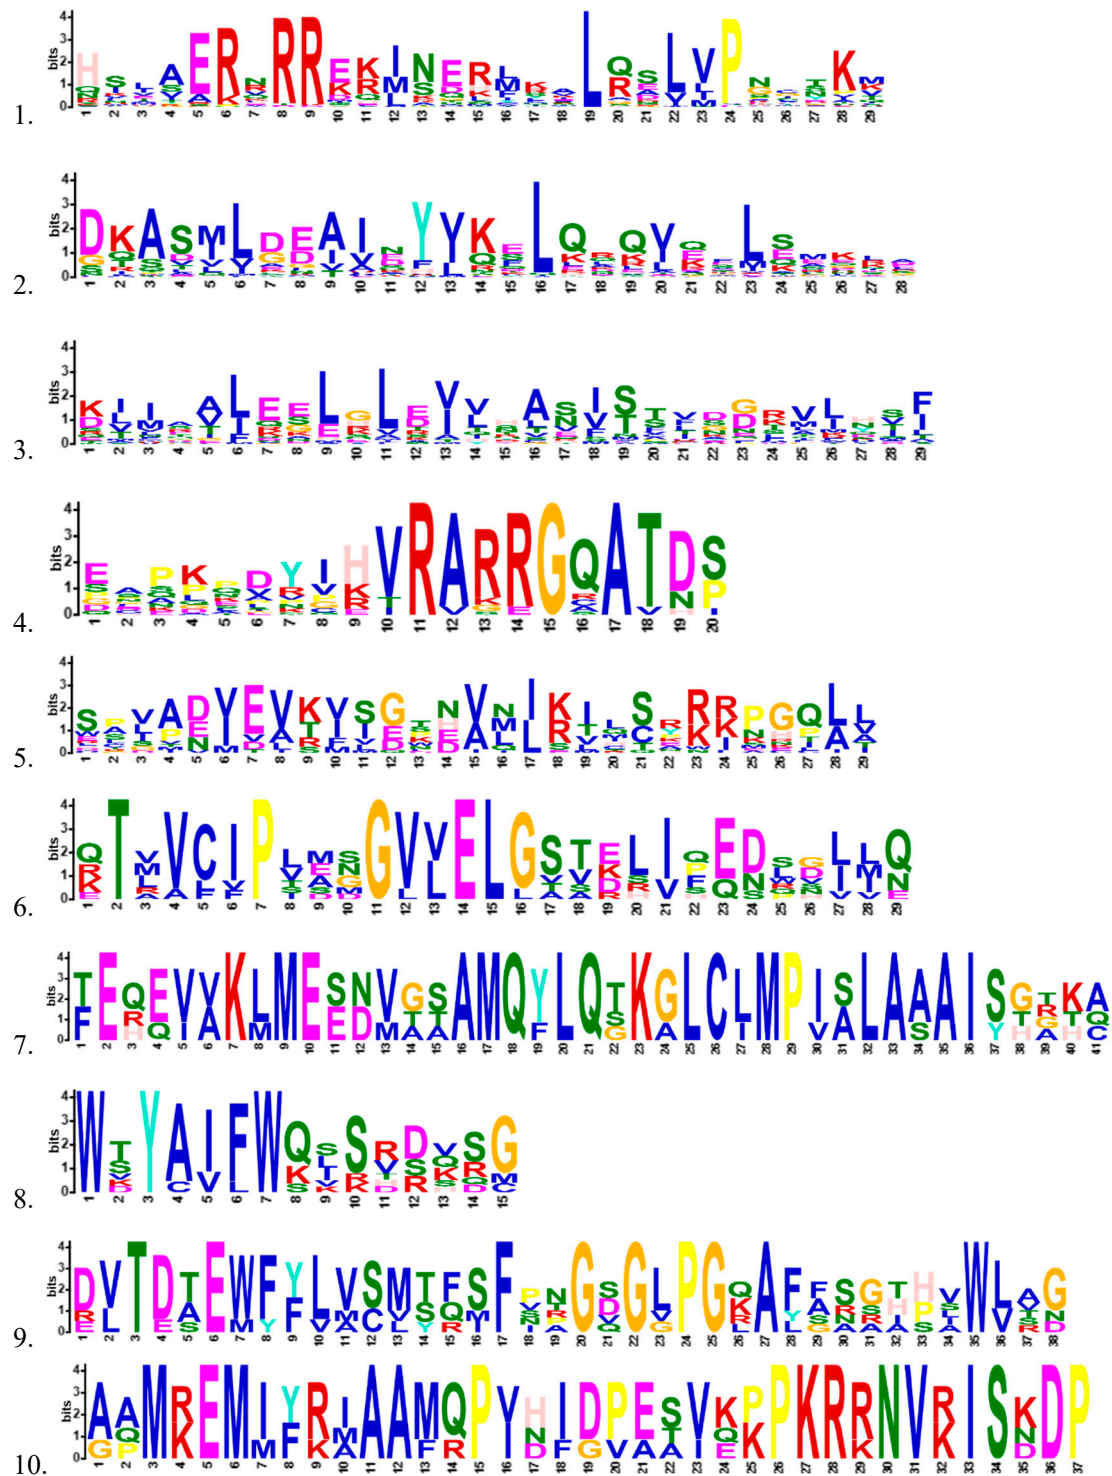

FigureS2. Logo of 10 conservative motifs of LcbHLH.

Supplement: s1 [file s1]
